# Supplementary material for: Gdf3 is required for robust Nodal signaling during germ layer formation and left-right patterning
Source: eLife. 2017 Nov 15;6:e28635. doi: 10.7554/eLife.28635 (PMC5745080; doi:10.7554/eLife.28635)
Supplement: Figure 3—source data 1. [file elife-28635-fig3-data1.xlsx]

## Sheet: Sheet2
	Wild-type embryos ->																																											MZgdf3 embryos ->
Embryo ID	1098			1099			1100			1101			1102			1103			1104			1105			1106			1107			1108			1109			1110			1111				1113			1114
	Degrees	Raw values	Transition point
	0	15720.5		0	16254		0	40701		0	16125		0	24361		0	17263.5		0	33041		0	32588		0	40777		0	17152		0	35387		0	36909.5		0	16148.5		0	34254			0	34240.5		0	32836.5
	1	15739.1		1	16244.9		1	42059.2		1	16429.8		1	23701.1		1	17370.1		1	35755.4		1	32450.3		1	42319		1	17182.9		1	38819.2		1	36702.7		1	16188.9		1	33877.7			1	33891.2		1	34935.2
	2	15734.8		2	16266.4		2	41208.5		2	16408.6	2	2	23143		2	17398.3		2	34007		2	31809.7		2	42777.1		2	17225.3		2	38556.1		2	35694.3		2	16200		2	34079.6			2	32872.4		2	34208.6
	3	15742.6		3	16281.2		3	40284.7		3	14848		3	23760.3		3	17412.4		3	32763.2		3	31815.9		3	44962.2		3	17202.1		3	37912.1		3	35655.2		3	16159.6		3	33710.9			3	33538		3	34278.7
	4	15791.7		4	16303.2		4	40463.1		4	14902.2		4	19674		4	17444.4		4	33228.8		4	33128		4	45340		4	17283		4	36957.7		4	36989.6		4	16166.2		4	34571.2			4	33427.2		4	36011.4
	5	15725.3		5	16276.7		5	41053.9		5	14920.4		5	19034		5	17448.8		5	34275.2		5	32434.5		5	42552.8		5	17290		5	33137.1		5	36253.4		5	16167.9		5	33442.9			5	33446.4		5	33635.9
	6	15663.2		6	16302.8		6	40828.1		6	14937.5		6	18227.4		6	17466.2		6	34739.4		6	31999		6	44938.6		6	17328.9		6	34476.8		6	34358		6	16153.8		6	32236.4			6	33600.8		6	31536.8
	7	15723.4		7	16247.4		7	40600		7	14962.9		7	17151.1	7	7	17420.6		7	32364.1		7	31362.1		7	45968.3		7	17275.6		7	33695.2		7	34431.9		7	16195.5		7	32057.4			7	33366.9		7	27601.9
	8	15758.8		8	16259.7		8	39519		8	14942.6		8	15595.9		8	17465.4		8	33093.5		8	30416.4		8	43636		8	17306.3		8	30886.3		8	36104.1		8	16203.6		8	32089.7			8	33329.6		8	28502.8
	9	15773		9	16239.1		9	39708.5		9	15002.3		9	15652.2		9	17402.2		9	31847.2		9	29457.6		9	47251.7		9	17337		9	31291.1		9	38038.5		9	16210.5		9	31299.1			9	32869.3		9	29220.4
	10	15795.7		10	16182.5		10	40286.2		10	15094		10	15627.5		10	17407.8		10	30970.5		10	29533		10	46678.1		10	17313.2		10	28776.9		10	36508.6		10	16245.7		10	28869.5			10	32904.3		10	29584.7
	11	15769.1		11	16231.6		11	38981.8		11	15070.9		11	15640.6		11	17427.6		11	32728.2		11	28988.6		11	43179.1		11	17337.7		11	25701.3		11	38219		11	16274.9		11	28622.4			11	33474.6		11	32954.1
	12	15753.3		12	16250.5		12	38891.7		12	15130		12	15690.8		12	17392.5		12	30293		12	28387.3		12	44756.8		12	17422.8		12	26076.5		12	38558.6		12	16344.8		12	27947.9			12	34423.6		12	34583.4
	13	15751.3		13	16239.9		13	38863.4		13	15138.9		13	15691.3		13	17353.3		13	31477.2		13	28468.5		13	43975.6		13	17401.6		13	22860.1		13	34804.2		13	16364.8		13	28495.5			13	34718		13	29769.3
	14	15692.1		14	16260.7		14	38729.6		14	15147.7		14	15727.1		14	17347.1		14	31774.1		14	27932.2		14	44509.4		14	17457.9		14	24500.7		14	38564.5		14	16281.6		14	28455.6			14	35472.1		14	26612.8
	15	15716.8		15	16299.8		15	38605.7		15	15187.9		15	15667.8		15	17327.1		15	30237.9		15	27875.4		15	41751.5		15	17437.8		15	23079.1		15	39755.3		15	16335.3		15	28658.1			15	35792.3		15	19284.4	15
	16	15725.6		16	16312		16	39379.9		16	15204.1		16	15660.3		16	17343.3		16	29248.9		16	26757.7		16	44123.9		16	17491.8		16	20657.9		16	38683		16	16303.1		16	27931			16	35751.8		16	17214.8
	17	15652.3		17	16295.7		17	39727.7		17	15198.6		17	15592.2		17	17378		17	31234.3		17	27353.6		17	41513.9		17	17478.3		17	19013.5		17	37226.7		17	16282.4		17	27224.7			17	35362.6		17	17000.2
	18	15734.5		18	16280.6		18	38724.2		18	15265.5		18	15664.9		18	17327.6		18	31211.4		18	27019.5		18	45002.8		18	17450.7		18	18575.5		18	38030.2		18	16381		18	26417.2			18	35408.1		18	17272.4
	19	15776.8		19	16246.1		19	39560		19	15212		19	15662		19	17278.8		19	30250.2		19	26369.1		19	43747.1		19	17432.7		19	17438.1		19	39226.1		19	16316.1		19	25817.6			19	35791.1		19	17032.8
	20	15718.2		20	16254.1		20	39661.7		20	15240.9		20	15755.3		20	17277.8		20	30898.7		20	27106.3		20	42882.4		20	17480.6		20	16938.7		20	39084.6		20	16322.4		20	23229.2			20	35829.8		20	20544.9
	21	15716.6		21	16260.6		21	39969.1		21	15287.1		21	15719.8		21	17253.1		21	30161.4		21	27930.8		21	43717.1		21	17468.2		21	16387.4	21	21	39332.9		21	16317.7		21	18893.3			21	35845.7		21	17547.5
	22	15698.6		22	16259.5		22	39647		22	15337.7		22	15726.7		22	17273.3		22	29616		22	27794.1		22	44929.6		22	17474.1		22	15364		22	37934.7		22	16321.7		22	19873.1	22		22	34554.3		22	17159.8
	23	15740.7		23	16210.5		23	39867.5		23	15295.4		23	15659.5		23	17284		23	28174.5		23	27465.8		23	44828.9		23	17561.4		23	15298.5		23	39029.9		23	16359.7		23	16732.7			23	34398.5		23	17233.3
	24	15706		24	16191.4		24	40114.9		24	15336.8		24	15669.9		24	17281.3		24	27867.2		24	26449.5		24	45524.5		24	17538.6		24	15268.9		24	40290.7		24	16317.4		24	16590.4			24	35061.5		24	17247.6
	25	15737.4		25	16221.7		25	39877.9		25	15379.6		25	15653.8		25	17231.7		25	26772.9		25	26746.6		25	46882.3		25	17509.2		25	15480.9		25	40310		25	16319.1		25	16633.4			25	35426.8		25	17355
	26	15738.3		26	16141.4		26	38297.3		26	15338.4		26	15619.9		26	17252.7		26	25256.1		26	25700.7		26	45703.7		26	17500.4		26	15340		26	38783.8		26	16283.2		26	16546.4			26	32378.9		26	17307
	27	15720.2		27	16090.6		27	38704.6		27	15380		27	15616		27	17250.2		27	23394		27	25232.8		27	46267.8		27	17513.1		27	15343.1		27	39145.4		27	16290.7		27	17200.2			27	33574.9		27	17374.9
	28	15673.6		28	16061.5		28	38453.8		28	15425.3		28	15678		28	17268.2		28	22002.7		28	24402.8		28	45987.7		28	17463.1		28	15307.3		28	40012.3		28	16232.1		28	16579.8			28	32735.5		28	17399
	29	15647.4		29	15980.6		29	37597.2		29	15449.7		29	15643.5		29	17268		29	20519.3		29	22294.7		29	46873.1		29	17431.8		29	15324.3		29	40680.9		29	16222.8		29	16595.3			29	33264.8		29	17446.4
	30	15584.1		30	15959.5		30	38285.5		30	15434.7		30	15663.4		30	17254.3		30	18403.1	30	30	18261.4		30	45158.2		30	17436.6		30	15343.7		30	40502.4		30	16259.4		30	16628.3			30	33278.8		30	17510.5
	31	15602.8		31	15969.5		31	38399.3		31	15433.1		31	15625.4		31	17239.3		31	16717.2		31	17895.5		31	46989.5		31	17434.2		31	15364.7		31	39683.9		31	16288.9		31	16654.2			31	33345.1		31	17557.7
	32	15608.3		32	15970.5		32	38108.8		32	15458		32	15614.3		32	17191.9		32	16374.9		32	17029.7	32	32	47958.3		32	17371.4		32	15378.2		32	38311.8		32	16346		32	16657.9			32	33729.4		32	17641.8
	33	15640.4		33	15939.4		33	38637.4		33	15461.1		33	15597.5		33	17180.4		33	16325.6		33	15385.7		33	47778.2		33	17414.1		33	15423.7		33	38598.4		33	16343.2		33	16612.7			33	34704.5		33	17686.9
	34	15609.3		34	15979.6		34	37852.2		34	15492.8		34	15627.8		34	17087.9		34	16417.1		34	15582.4		34	48074.7		34	17359.6		34	15512		34	36581.8		34	16387.4		34	16627.4			34	34383.7		34	17599.5
	35	15608.1		35	15967.3		35	36952.3		35	15509.6		35	15617.7		35	17079.5		35	16413.9		35	15373.5		35	44336.5		35	17309.8		35	15589.1		35	37708.6		35	16371.8		35	16721			35	34583		35	17626.5
	36	15591.5		36	15942		36	38031.8		36	15504.3		36	15588.4		36	17024.4		36	16442.1		36	15197.9		36	42309.8		36	17295.5		36	15593.1		36	36664.7		36	16412.1		36	16756.1			36	34299.5		36	17628
	37	15567.9		37	15902		37	37159.3		37	15511.7		37	15523.8		37	16963.5		37	16531.2		37	15193.3		37	43735.2		37	17255.2		37	15662.4		37	38706.2		37	16390.3		37	16808.9			37	33622.7		37	17678.9
	38	15539		38	15979.8		38	36372.3		38	15536.3		38	15525.9		38	16897.9		38	16514.3		38	15220.5		38	43343.8		38	17247.3		38	15609.5		38	38032.3		38	16398.7		38	16829.5			38	34020		38	17674.6
	39	15509.3		39	15934.5		39	36060.2		39	15467.7		39	15517.9		39	16921.6		39	16549.2		39	15249.1		39	42924.6		39	17197.3		39	15623.1		39	35536.4		39	16401		39	16822.9			39	33692.3		39	17641.8
	40	15459.4		40	15895		40	36194.2		40	15449		40	15468.1		40	16857.2		40	16655.4		40	15297.1		40	44678.9		40	17186.6		40	15665.6		40	36251.8		40	16389		40	16848.8			40	34076.7		40	17734.2
	41	15491.9		41	15885.6		41	36583.9		41	15481.7		41	15494.9		41	16841		41	16615.6		41	15290.2		41	44328.7		41	17121		41	15729.5		41	36784.1		41	16385.5		41	16860.1			41	34576.2		41	17714
	42	15504.6		42	15807.6		42	36032		42	15552.4		42	15533.8		42	16737.8		42	16681.1		42	15358		42	43138.2		42	17052.6		42	15738.7		42	35554.8		42	16402.1		42	16865.6			42	32779.3		42	17677.3
	43	15524.1		43	15840.5		43	34427.4		43	15567.1		43	15563.6		43	16758.4		43	16676.6		43	15361.4		43	42414.2		43	16938		43	15770		43	34184.4		43	16413.8		43	16809.6			43	31713.8		43	17767.9
	44	15499.6		44	15817.5		44	34815.1		44	15618		44	15553.6		44	16747.7		44	16742.7		44	15384.2		44	43607.1		44	17896.1		44	15821.2		44	34660.7		44	16314.2		44	16855.8			44	30384.4		44	17737.6
	45	15453.8		45	15765.7		45	35505.7		45	15644.6		45	15540		45	16774.2		45	16770.4		45	15402.7		45	46231.2		45	18996.4		45	15857		45	35888.2		45	16259.4		45	16856.4			45	29669		45	17744
	46	15439.8		46	15727.7		46	35572.4		46	15685		46	15558.8		46	16763.1		46	16778.7		46	15407.6		46	46167		46	17841.9		46	15830.2		46	34867.4		46	16318.1		46	16892.7			46	29858.4		46	17761
	47	15412.8		47	15668.2		47	35840.3		47	15668.3		47	15467.4		47	16827.6		47	16803.8		47	15479.1		47	42714.2		47	16791.3		47	15826.2		47	35777.2		47	16316.8		47	16887.4			47	28595.4		47	17736
	48	15408.2		48	15665.7		48	35160.6		48	15720.9		48	15480.4		48	16777.2		48	16803.5		48	15454		48	42944.1		48	16742.9		48	15908		48	34051.5		48	16294.3		48	16977.1			48	27023.2		48	17748.6
	49	15370.1		49	15638.8		49	34589.1		49	15721.9		49	15451.7		49	16802.2		49	16778		49	15504.5		49	43894.8		49	16818.9		49	15882.9		49	31007.6		49	16304.7		49	16899.8			49	25857.2		49	17838.5
	50	15340		50	15524.6		50	34633.3		50	15703.4		50	15447.4		50	16758.9		50	16853.5		50	15561.3		50	41613.5		50	16756.4		50	15941.9		50	29482		50	16330.3		50	16962.2			50	25163.8		50	17854.5
	51	15277.5		51	15498.5		51	33839.2		51	15725.7		51	15475.5		51	16756		51	16837		51	15519.9		51	41230.2		51	16713.5		51	15943.2		51	29131.8		51	16361.3		51	16978.1			51	25194		51	17837.6
	52	15215.3		52	15388.1		52	32292.3		52	15803.7		52	15415		52	16742.4		52	16866.3		52	15595		52	41034.4		52	16706.2		52	15914		52	27869.6		52	16349.4		52	17011.1			52	23847.4		52	17874.7
	53	15424.3		53	15315.9		53	32241.2		53	15764.5		53	15446.4		53	16752.1		53	16882.3		53	15594.8		53	39492.8		53	16724.7		53	15961.4		53	25476.5		53	16270.9		53	16953.3			53	21983.7		53	17909.7
	54	15230.2		54	15246.7		54	31944		54	15850.7		54	15470.9		54	16647.9		54	16894.9		54	15613.6		54	37943.9		54	16689.6		54	15987.9		54	24185.1		54	16255.1		54	16917.3			54	20878		54	17878.6
	55	16569.3	55	55	15174.4		55	30372.8		55	15864.6		55	15514		55	16640.9		55	16956.8		55	15677.5		55	36590.6		55	16617.9		55	16078.7		55	22948.7		55	16195.3		55	16931.4			55	18559.7	55	55	17903.9
	56	16187.3		56	15056.5		56	30536.2		56	15822		56	15502.6		56	16613.7		56	16988.1		56	15628.2		56	39193.4		56	16611.8		56	16123.4		56	23271.2		56	16235.7		56	16899.4			56	16629.7		56	17964.2
	57	15910.1		57	14972		57	30890.6		57	15834.4		57	15553.5		57	16611.4		57	16909.9		57	15716.9		57	36040.5		57	16570.8		57	16080.9		57	24757.2		57	16223.4		57	16915.3			57	16624.2		57	17979.6
	58	15736.2		58	14899.6		58	29722		58	15859		58	15502.5		58	16555.9		58	16892		58	15714.5		58	35960.2		58	16536		58	16093.7		58	24219.3		58	16227.7		58	16854.8			58	16588.5		58	18035.4
	59	16626		59	14802.7		59	29495		59	15906.3		59	15489.5		59	16524.9		59	17008.6		59	15796.1		59	35916		59	16531.2		59	16056.8		59	21785.5		59	16223.2		59	16870.1			59	16606.2		59	17993.5
	60	18372.5		60	14704.5		60	28520.2		60	15919.5		60	15517		60	16531.6		60	17015.8		60	15836.1		60	35120.1		60	16482		60	16080.7		60	23447.3		60	16235.8		60	16878.6			60	16647.4		60	18006.1
	61	16792.9		61	14624.2		61	27952.3		61	15926.2		61	15560.8		61	16565.2		61	17022.2		61	15851.6		61	35336.2		61	16428.4		61	16150.6		61	25138		61	16295.6		61	16868.7			61	16690.3		61	18050.2
	62	20112		62	14465.5		62	26339.3		62	15947.8		62	15534.5		62	16512.3		62	17053.5		62	15854.5		62	36545.6		62	16418.4		62	16151.8		62	25803.4		62	16243.3		62	16859.4			62	16753		62	18100.4
	63	24950.4		63	14390.9		63	24907		63	15930.2		63	15557.6		63	16501		63	17086		63	15869.1		63	34338.2		63	16388.3		63	16168.1		63	22619.5		63	16248.1		63	16796.2			63	16769		63	18083.2
	64	28266.5		64	14356.7		64	23277.4		64	15944.9		64	15599.3		64	16477.8		64	17124.7		64	15908.8		64	33027		64	16419.9		64	16217.3		64	22968.6		64	16211.8		64	16847.7			64	16811		64	18088.2
	65	29811.4		65	14326.8		65	22219.2		65	15971.3		65	15618		65	16422.2		65	17152.5		65	15923.4		65	33850		65	16358.2		65	16274.7		65	20556		65	16293.4		65	16820.2			65	16840.9		65	18095.5
	66	31902.7		66	14267.5		66	22097.3		66	15910.8		66	15692.4		66	16410.2		66	17174		66	15962.5		66	30784.9		66	16342.9		66	16290.6		66	17856.6		66	16288.5		66	16805.6			66	16895.7		66	18105
	67	32479.6		67	14255.4		67	22722.9		67	15924		67	15676.4		67	16379.7		67	17122.2		67	15990.5		67	28234.7		67	16261.1		67	16365.3		67	15910.1		67	16317.6		67	16829.8			67	16919.4		67	18090.5
	68	34249.2		68	14323.9		68	22128.7		68	15961.3		68	15672.9		68	16379.1		68	17119.7		68	16001.9		68	28610.3		68	16233.1		68	16353.9		68	16195.3		68	16304.3		68	16839.6			68	16927.9		68	18084.6
	69	35504.5		69	14276.2		69	23098.8		69	15945.8		69	15688		69	16375.3		69	17184.7		69	16025.8		69	28941.2		69	16161.8		69	16340.7		69	16348.2	69	69	16295.4		69	16839.2			69	16938		69	18117.9
	70	34751.7		70	14323.4		70	21303.3		70	15974.9		70	15706.7		70	16328.8		70	17198.2		70	16024.4		70	30549.6		70	16138.5		70	16348.3		70	15393.5		70	16296.8		70	16867.5			70	16952.1		70	18123
	71	34838.3		71	14354.5		71	21716.1		71	15966.7		71	15735.7		71	16329.8		71	17219.9		71	16009.2		71	27561.9		71	16094.7		71	16353.3		71	15444		71	16243.9		71	16867			71	16970.2		71	18049.6
	72	35402.4		72	14368.2		72	19989.5		72	16055.5		72	15772.2		72	16249.3		72	17222.5		72	16065.8		72	26085.3		72	16070.2		72	16385		72	15462.8		72	16195.2		72	16918.6			72	16921		72	18099.4
	73	34292.9		73	14382.4		73	19443.3		73	15987		73	15798.1		73	16298.3		73	17296.8		73	16093.8		73	24858.9		73	16075.2		73	16392.6		73	15497		73	16209.7		73	16869.6			73	16997.1		73	18095
	74	35873.8		74	14383.5		74	16976.3		74	15970.5		74	15771.2		74	16287.4		74	17256.8		74	16144		74	19138.2		74	16055.7		74	16428.2		74	15564.2		74	16255.8		74	16841.2			74	17023		74	18115.1
	75	37202.5		75	14408.2		75	17195.8	75	75	16026.5		75	15774.7		75	16251.7		75	17347.5		75	16142.3		75	16237.4		75	16090.6		75	16419.8		75	15570.9		75	16276.2		75	16859.1			75	17058.1		75	18130.1
	76	38230.4		76	14383.5		76	16356.6		76	16058.6		76	15785.5		76	16295.1		76	17349.2		76	16093.8		76	18213.5		76	16034.4		76	16430		76	15627.3		76	16277.6		76	16846.8			76	17092.9		76	18121
	77	38360.2		77	14359.5		77	16354.8		77	16063.4		77	15797.2		77	16253.1		77	17330.6		77	16088		77	16659.5		77	16111.5		77	16468		77	15658.1		77	16283.5		77	16814.6			77	17148		77	18192.8
	78	35992.4		78	14523.1		78	16343.8		78	16036.9		78	15845.2		78	16265.1		78	17314.3		78	16169.3		78	16570.5		78	16060.5		78	16482.5		78	15640.3		78	16290.6		78	16809.9			78	17173.8		78	18129.4
	79	37677.6		79	14563.9		79	16349.4		79	15979.8		79	15812.5		79	16257.1		79	17287.3		79	16135.2		79	16706.6		79	16060.9		79	16463.3		79	15650		79	16328.2		79	16805.3			79	17168.3		79	18183.8
	80	37591		80	14543.9		80	16373.3		80	16039.5		80	15831.6		80	16289.3		80	17276.2		80	16163.6		80	16234.1	80	80	16082.5		80	16481.9		80	15640.2		80	16292.6		80	16800.5			80	17148.1		80	18171.3
	81	36830		81	14352.2		81	16367.7		81	15984.5		81	15851.7		81	16269.9		81	17275.3		81	16205.4		81	15970.7		81	16021.5		81	16514.2		81	15616		81	16302.7		81	16710.5			81	17163.3		81	18184.7
	82	36249.8		82	14306.9		82	16382.5		82	16015.6		82	15817.5		82	16281		82	17281.8		82	16236		82	16260.7		82	16026.7		82	16462		82	15668.5		82	16360.5		82	16710.9			82	17135.7		82	18244.6
	83	36474.6		83	14807.7		83	16376.9		83	16019.9		83	15826.8		83	16282.1		83	17338.9		83	16236.2		83	17518.5		83	16020.7		83	16445.6		83	15722.9		83	16355.5		83	16751.6			83	17155.7		83	18240.7
	84	37677.3		84	17838	84	84	16426.3		84	16016.6		84	15785.1		84	16242.5		84	17349		84	16234.2		84	16045.4		84	16015.5		84	16446.2		84	15741.6		84	16277.8		84	16670.4			84	17252		84	18205.6
	85	38654.6		85	17749.8		85	16371		85	16022.5		85	15721.7		85	16202.1		85	17352.3		85	16232.3		85	15872.2		85	15999.1		85	16398.8		85	15713.7		85	16276.8		85	16644.9			85	17269.6		85	18190.8
	86	37974.3		86	19805		86	16431.9		86	16082.1		86	15789.5		86	16215.9		86	17351.3		86	16258.3		86	15911.6		86	16050.7		86	16474.1		86	15822.4		86	16294.1		86	16725.4			86	17279.4		86	18188.8
	87	38092.5		87	19232		87	16391.5		87	16069.3		87	15750		87	16268		87	17325.3		87	16256.7		87	15966.4		87	16032.9		87	16394.6		87	15787.3		87	16300.7		87	16682.6			87	17269.4		87	18159.9
	88	37503.1		88	19742.8		88	16459.1		88	16112.2		88	15813.6		88	16244.1		88	17296.8		88	16252.9		88	15973.7		88	16069.1		88	16467.4		88	15863.7		88	16286		88	16693.3			88	17268.1		88	18173.6
	89	38468.1		89	20492.2		89	16505		89	16128.9		89	15806.2		89	16238.5		89	17270.5		89	16268.3		89	16014.4		89	16053.1		89	16498.8		89	15900.3		89	16333.8		89	16654.2			89	17257.1		89	18167.8
	90	37501.5		90	20956		90	16473		90	16099		90	15831		90	16257		90	17326.2		90	16297		90	16026.5		90	16009		90	16429		90	15839.5		90	16362		90	16611			90	17261.5		90	18169
	91	37410.9		91	22221.2		91	16536.6		91	16137.8		91	15876.3		91	16259.4		91	17376.6		91	16312.3		91	16041.2		91	16053.4		91	16512.7		91	15941.4		91	16360.6		91	16680.3			91	17249.5		91	18200.7
	92	37613.5		92	22016.4		92	16550.9		92	16142.9		92	15866.8		92	16250.6		92	17414.1		92	16321.1		92	16069.9		92	16093.7		92	16535.4		92	15961.2		92	16369.4		92	16674			92	17297		92	18208.8
	93	37469.7		93	23982.2		93	16495.3		93	16093		93	15875.8		93	16231.4		93	17403.8		93	16337.9		93	16085.9		93	16056.2		93	16472.2		93	15921		93	16394.9		93	16611.9			93	17262.7		93	18212.9
	94	36243.1		94	26139.6		94	16581.8		94	16150.7		94	15937.6		94	16249.1		94	17413.7		94	16332		94	16085.9		94	16097.7		94	16496.8		94	16007.5		94	16363.3		94	16676			94	17257.7		94	18209.7
	95	36781.6		95	26867.3		95	16507		95	16103.1		95	15962.2		95	16337.1		95	17423.6		95	16334.7		95	16100.9		95	16089.9		95	16399.2		95	15979.1		95	16361.7		95	16646.7			95	17247.1		95	18216.1
	96	36546.3		96	26719.7		96	16585.4		96	16095.3		96	15989.3		96	16374.3		96	17456.4		96	16304.3		96	16156.5		96	16091.1		96	16450.1		96	16059.5		96	16437.8		96	16729.7			96	17280.2		96	18262.9
	97	36957.3		97	27344.7		97	16572.7		97	16113.6		97	15982.2		97	16379.5		97	17473.4		97	16279.6		97	16197.2		97	16070.5		97	16459.4		97	16109.1		97	16421.9		97	16713			97	17224.1		97	18263.1
	98	36791.3		98	26550.1		98	16569		98	16106.6		98	15956.7		98	16398.9		98	17418.6		98	16234.1		98	16228		98	16048		98	16444.5		98	16118.8		98	16396.8		98	16730.1			98	17211.4		98	18246.5
	99	37127.3		99	27088.4		99	16548.1		99	16082.8		99	15967.6		99	16368.4		99	17358.7		99	16211.2		99	16189.9		99	15999.6		99	16411.5		99	16123.4		99	16416.2		99	16636.2			99	17212.8		99	18193.3
	100	37201.7		100	28660.6		100	16555.7		100	16140		100	16007.5		100	16333.1		100	17430.5		100	16119.6		100	16222.1		100	16032		100	16432.7		100	16134.5		100	16348.7		100	16650.3			100	17238.6		100	18201.3
	101	36110.9		101	26460.5		101	16569.4		101	16114		101	15977.3		101	16343.9		101	17327.8		101	16148.3		101	16253.6		101	15985.1		101	16399.2		101	16169.9		101	16373.7		101	16667			101	17273.1		101	18229.1
	102	35463.5		102	26825.6		102	16522.7		102	16230.6		102	16052.5		102	16237.8		102	17212.2		102	16176.7		102	16242.3		102	15952.9		102	16416.3		102	16154.5		102	16271		102	16652.2			102	17281.2		102	18184.3
	103	35723.7		103	27628.5		103	16587.5		103	16211		103	16005.8		103	16233.9		103	17170.7		103	16180.5		103	16158.5		103	15990.1		103	16398		103	16228.7		103	16287.5		103	16654.6			103	17282.2		103	18201
	104	35460.6		104	28921.4		104	16609.1		104	16238		104	16055.4		104	16148.3		104	17187.2		104	16138.8		104	16152.9		104	15880.1		104	16361.4		104	16252.4		104	16284.1		104	16705.8			104	17338.4		104	18174
	105	35440.9		105	29757.8		105	16618.6		105	16260.1		105	16113.3		105	16135.3		105	17222		105	16129.7		105	16183.6		105	15888.6		105	16368.6		105	16285.8		105	16270.7		105	16655.6			105	17324.4		105	18145.1
	106	34171.3		106	30675.2		106	16621.4		106	16268.6		106	16073.9		106	16136.8		106	17243		106	16120.5		106	16241.2		106	15895.3		106	16402.3		106	16257.9		106	16246.3		106	16626.5			106	17289.7		106	18167.4
	107	33319.4		107	30094.5		107	16604.2		107	16275.4		107	16094.2		107	16124.4		107	17271.4		107	16091		107	16271.9		107	15846.8		107	16421		107	16298.1		107	16239.5		107	16557			107	17291.2		107	18111.6
	108	32996.9		108	28438		108	16661.9		108	16257		108	16129.5		108	16069.7		108	17225.2		108	16140.7		108	16272.7		108	15814		108	16389.9		108	16338.8		108	16187.4		108	16567.1			108	17364.3		108	18093
	109	32572.1		109	29191.3		109	16630.8		109	16263.7		109	16153.3		109	16079.9		109	17223.4		109	16082		109	16250.9		109	15833		109	16370.7		109	16290.3		109	16214.3		109	16551			109	17323.1		109	18071
	110	33424.5		110	29444.8		110	16622.8		110	16214.7		110	16086.7		110	16076.8		110	17317.9		110	16040.4		110	16278.8		110	15787.3		110	16331.7		110	16263.9		110	16170.8		110	16536.7			110	17317.2		110	18071.3
	111	34791.9		111	30169.7		111	16654.3		111	16169.9		111	16087		111	16050.2		111	17317.1		111	16026.5		111	16285		111	15802.9		111	16339.1		111	16355.3		111	16155.3		111	16515			111	17380		111	18041.7
	112	33681.5		112	29893.6		112	16648.8		112	16144.1		112	16069.5		112	15993.4		112	17285		112	15975		112	16258.4		112	15782.3		112	16352.8		112	16379.8		112	16204.2		112	16494			112	17392.4		112	17995.6
	113	32398.7		113	30908.4		113	16619.2		113	16138.8		113	15982.9		113	15928		113	17259.2		113	16006.7		113	16243.4		113	15758.8		113	16321.7		113	16322.7		113	16222.4		113	16468.3			113	17391.7		113	17968.1
	114	30496.5		114	31631.5		114	16663		114	16138.7		114	15979.7		114	15914.1		114	17313.9		114	15920.9		114	16271.1		114	15751.1		114	16264.5		114	16279		114	16176.7		114	16512.9			114	17414.3		114	17979.8
	115	32470.7		115	31738.2		115	16610.3		115	16122.4		115	15999.7		115	15857.2		115	17244.6		115	15970.8		115	16284.9		115	15714.9		115	16310.4		115	16285.6		115	16192.9		115	16505.4			115	17334.8		115	18012.4
	116	31554.9		116	32233.5		116	16591.3		116	16156		116	16000.7		116	15812.8		116	17271		116	15893.6		116	16247.6		116	15745.5		116	16261.5		116	16249.5		116	16216.2		116	16497.2			116	17376.8		116	17991
	117	31737.8		117	31828.8		117	16587.1		117	16149		117	15942.8		117	15949.7		117	17244.3		117	15920.1		117	16222.3		117	15673.9		117	16241.2		117	16242.8		117	16229.1		117	16496.4			117	17328.8		117	18014.2
	118	31217.7		118	30850.3		118	16562.3		118	16140		118	15971.1		118	16850	118	118	17200.2		118	15912.1		118	16274.3		118	15658.3		118	16249.7		118	16264.8		118	16224.5		118	16484.8			118	17365.8		118	17995
	119	29645.8		119	33392.3		119	16600.8		119	16123.2		119	15984		119	17431		119	17158.9		119	15920		119	16247		119	15628.8		119	16194.6		119	16243.7		119	16202.8		119	16453.5			119	17356.3		119	17987.7
	120	31799.1		120	33005.1		120	16610.3		120	16140.7		120	15914.8		120	18890.4		120	17112.4		120	15931.5		120	16248.7		120	15656.9		120	16189.8		120	16291.3		120	16156.1		120	16534.8			120	17380.4		120	18055.3
	121	30274.2		121	33711.3		121	16653.9		121	16164.1		121	15908.7		121	20944.4		121	17070.1		121	15922.7		121	19614.9		121	15650.2		121	16218.1		121	16183.2		121	16177.4		121	16566.4			121	17372.9		121	17974.6
	122	32063.5		122	30660.8		122	16611.5		122	16110.3		122	15896.2		122	21796.6		122	16993.5		122	15967.8		122	20846.5		122	15637.6		122	16199.5		122	16206.4		122	16117.3		122	16577.3			122	17353.7		122	18032.6
	123	33473.7		123	29468		123	16597		123	16124.3		123	15898.8		123	22050		123	16997.7		123	15906.5		123	20888.7		123	15636.7		123	16192.5		123	16273.7		123	16078.1		123	16600.9			123	17345.8		123	17991
	124	28436.5		124	31146.7		124	16646		124	16071.6		124	15864.5		124	22451.7		124	16906.5		124	15913.3		124	19297.6		124	15613.1		124	16185.7		124	16186.5		124	16037.9		124	16526.4			124	17335.7		124	18006.6
	125	29898		125	30200		125	16676.3		125	16088.9		125	15895.8		125	22210.6		125	16836.1		125	15878.9		125	18966		125	15755.8		125	16211.4		125	16258.6		125	16058		125	16571.9			125	17323.3		125	18067.3
	126	30813.6		126	29051.8		126	16683.4		126	16068.4		126	15907.9		126	21829.2		126	16780.3		126	15889.4		126	18378.6		126	15725.6		126	16146.9		126	16265.7		126	16062.7		126	16554.3			126	17304		126	18043.5
	127	29160.5		127	29494.7		127	16637.1		127	16044		127	15917.6		127	22056.3		127	16731.6		127	15878.5		127	16725.8		127	17032.1	127	127	16127.9		127	16277.1		127	16004.4		127	16581.8			127	17345.9		127	18079.5
	128	29303.2		128	29559.7		128	16694.4		128	16066.7		128	15929.9		128	23823.9		128	16723.3		128	15821.2		128	16809		128	17937.7		128	16113		128	16399.4		128	16029.9		128	16551			128	17339.4		128	18083.7
	129	27382.8		129	29715.3		129	16666.6		129	16006.8		129	15971.7		129	24201.3		129	16674.4		129	15864.1		129	16210.8		129	22130		129	16076		129	16387		129	16034.4		129	16560.1			129	17344.5		129	18090.7
	130	28534.5		130	30389.1		130	16607.5		130	15977.1		130	15950.4		130	24204.9		130	16642.2		130	15850.2		130	15901.7		130	25826.8		130	16116.3		130	16410.1		130	15998.7		130	16597.3			130	17340.8		130	18057.7
	131	28964.3		131	28446.7		131	16564		131	15877.1		131	15961.9		131	24509.7		131	16701.8		131	15815.6		131	15940		131	25756.9		131	16112.3		131	16405.4		131	16013.3		131	16573.5			131	17362.3		131	18018.5
	132	30503.6		132	27386.8		132	16597.4		132	15837.6		132	16006		132	23692.5		132	16653.3		132	15802.1		132	16121.5		132	27344.8		132	16113.3		132	16428.5		132	15948.7		132	16556.1			132	17310.3		132	18064.6
	133	30289.1		133	26685		133	16559.7		133	15918.6		133	15964.1		133	22908.2		133	16679.7		133	15795.8		133	16204.2		133	26249.8		133	16102.6		133	16426.5		133	15930.7		133	16549.3			133	17306.4		133	18029.9
	134	33911.4		134	27245.3		134	16593.7		134	15925.4		134	15913.8		134	23752.4		134	16582.8		134	15772.6		134	16311.1		134	27585.6		134	16028.7		134	16422		134	16035.6		134	16557			134	17286.9		134	18072.1
	135	28762.8		135	29574.6		135	16623.6		135	15919.7		135	15979.4		135	25260.3		135	16543.5		135	15795.8		135	16303.9		135	29296.2		135	16046.4		135	16412.2		135	16040.2		135	16566.2			135	17244.9		135	18048.2
	136	27240.4		136	28935.1		136	16598.1		136	15907.7		136	15912.6		136	24644		136	16545.9		136	15675.9		136	16365.3		136	29926.5		136	15999.5		136	16458		136	16025.6		136	16540.3			136	17251.9		136	18025.2
	137	28219		137	31229.9		137	16693.3		137	15893.5		137	15973.6		137	24677.5		137	16549.2		137	15681.8		137	16347		137	29794.1		137	16084.2		137	16483.7		137	15935.5		137	16567.3			137	17282		137	18098.5
	138	29400.4		138	28771.6		138	16637.8		138	15853.6		138	15965.9		138	23227.8		138	16549.8		138	15596.9		138	16343.1		138	30686.9		138	16110		138	16480.2		138	15871.2		138	16527.7			138	17277.5		138	18082.3
	139	31303.8		139	28443		139	16636.2		139	15800		139	16009.3		139	24381.6		139	16581.8		139	15599.9		139	16343.9		139	30626.3		139	16058.4		139	16477.2		139	15897.8		139	16566.8			139	17299.7		139	18079.5
	140	33269.4		140	31592		140	16685.7		140	15819.6		140	16122.6		140	24927.5		140	16594.1		140	15605.3		140	16383.1		140	32234.5		140	16071.1		140	16438.5		140	15847.1		140	16559.3			140	17285		140	18094.5
	141	26558.6		141	33458.5		141	16702.1		141	15782.7		141	16027.5		141	24693.3		141	16671.9		141	15612.4		141	16353.4		141	30495.5		141	16122.8		141	16329.4		141	15869.4		141	16513.3			141	17349.9		141	18119.4
	142	27971.3		142	33306.5		142	16699.7		142	15719.6		142	16018.7		142	25319		142	16624.8		142	15542.9		142	16392.9		142	30565.3		142	16090.9		142	16310.8		142	15912.6		142	16529.2			142	17396.4		142	18051.8
	143	28846.5		143	33835.9		143	16687.7		143	15671.4		143	16003.8		143	27079.3		143	16622.9		143	15547.7		143	16368		143	29253.6		143	16124.5		143	16257.5		143	15909.5		143	16571.2			143	17384.4		143	18105.1
	144	29977.4		144	35257.6		144	16724		144	15662		144	16038.9		144	26734.8		144	16615.1		144	15561.3		144	16411.5		144	29328.3		144	16163.1		144	16288.1		144	15884.3		144	16575.6			144	17398.4		144	18077.7
	145	29973		145	32815.7		145	16688.3		145	15614.6		145	16040.3		145	28468		145	16628.9		145	15516.9		145	16461		145	30145.3		145	16155.3		145	16301.2		145	15888.1		145	16588.6			145	17387.6		145	18033.7
	146	27042.1		146	30581.3		146	16660.7		146	15594.5		146	16056.9		146	28872.7		146	16664.9		146	15510.3		146	16459.7		146	32133.4		146	16114.1		146	16259		146	15856.7		146	16577			146	17416.2		146	17997.8
	147	26588.5		147	31194.4		147	16715.7		147	15576.8		147	16137.6		147	28017.7		147	16590.4		147	15510		147	16463.2		147	33162		147	16090.5		147	16309.5		147	15819.2		147	16639			147	17406.9		147	18015.2
	148	26908.5		148	31200.3		148	16654		148	15502.9		148	16118.5		148	28500		148	16578.3		148	15472.5		148	16454.2		148	33411.1		148	15990.2		148	16269.6		148	15815.6		148	16627			148	17373.7		148	17988.4
	149	27079		149	33070.8		149	16708.4		149	15474.5		149	16115.5		149	27809.3		149	16619.7		149	15484.1		149	16521.5		149	29406.4		149	16049.4		149	16176.6		149	15765.8		149	16587.9			149	17347.3		149	17975.4
	150	28229.3		150	32394.4		150	16736.6		150	15487.4		150	16157.2		150	27939.5		150	16537		150	15476.9		150	16433.1		150	28843		150	16052		150	16835.4		150	15805.6		150	16629.6			150	17344.7		150	17936.3
	151	26860.4		151	31953.3		151	16683.3		151	15481.1		151	16269.1		151	28593.5		151	16537.8		151	15460.9		151	16514.5		151	32169.1		151	16073.9		151	18018.4		151	15734.9		151	16641.6			151	17333.1		151	17888.8
	152	26104.2		152	34870		152	16770.1		152	15454.9		152	16193.1		152	28061.9		152	16527.6		152	15457		152	16533.6		152	35249.8		152	16070.8		152	18698.6		152	15695.8		152	16640.4			152	17283.4		152	17873.6
	153	26174.5		153	33866.1		153	16675.5		153	15434.1		153	16221.6		153	28038.5		153	16526.4		153	15380.4		153	16513.2		153	37932.2		153	16022.3		153	18520		153	15689.5		153	16641.5			153	17318.5		153	17830
	154	27506.4		154	32740.5		154	16736.6		154	15406.8		154	16214.8		154	27921		154	16580.3		154	15354.4		154	16536.2		154	33639.4		154	15956.7		154	17656.3		154	15686.2		154	16698			154	17276.3		154	17838.5
	155	26690		155	33452.9		155	16713.8		155	15399.8		155	16188.2		155	27629.8		155	16574		155	15369.2		155	16568.6		155	31028.4		155	15938.2		155	16236.3		155	15646.7		155	16663.7			155	17251		155	17788.1
	156	27844.9		156	31474.9		156	16757.2		156	15311.4		156	16148.6		156	29088.7		156	16606.9		156	15369.9		156	16547.7		156	31214.3		156	15916.6		156	16270.3		156	15797.3		156	16702.1			156	17228.6		156	17749.4
	157	30168.5		157	31140.3		157	16759.5		157	15297.3		157	16178.8		157	28861.4		157	16635.6		157	15359.8		157	16570.4		157	35907.9		157	15950.1		157	16330.9		157	18391.1	157	157	16663.7			157	17265.4		157	17766.9
	158	29491.3		158	31407.9		158	16821.2		158	15293.5		158	16190.6		158	30696.8		158	16651.8		158	15322.9		158	16586		158	33300.5		158	15936.2		158	16430.8		158	20977.7		158	16637.8			158	17242.7		158	17672.5
	159	30494.9		159	29425.8		159	16842		159	15279.7		159	16194.2		159	27601.5		159	16657.5		159	15260.4		159	16594.1		159	31630.1		159	15951.2		159	16467.9		159	21756		159	16656.5			159	17301.1		159	17711.5
	160	31317.6		160	30611.2		160	16857.7		160	15259.7		160	16164.1		160	26527.2		160	16636		160	15306.9		160	16566.6		160	29943.9		160	15952.5		160	16551.8		160	23421		160	16629.6			160	17322.1		160	17700.8
	161	30120.3		161	31333.7		161	16837.8		161	15247		161	16085.1		161	28204.1		161	16629.6		161	15305		161	16572.5		161	30222.4		161	15941		161	16560.3		161	23559.1		161	16636			161	17378		161	17660.2
	162	29312.2		162	33879.9		162	16830.6		162	15237.3		162	16089.5		162	28973.8		162	16663		162	15287.3		162	16621.7		162	31786.4		162	15923.3		162	16528.8		162	24920.9		162	16591.6			162	17375		162	17680.3
	163	29020.4		163	32563.9		163	16863.6		163	15110.5		163	16046.4		163	30457.7		163	16653.2		163	15339		163	16558.3		163	36024.4		163	15909.8		163	16564.8		163	24926.9		163	16589.1			163	17345.8		163	17660.5
	164	29771.6		164	33159.1		164	16848.8		164	15134.3		164	16056.1		164	28816.5		164	16617.8		164	15276.6		164	16596.2		164	34513.8		164	15957.5		164	16589.6		164	24977.1		164	16562.7			164	17305.6		164	17659.2
	165	26295.4		165	34710.7		165	16861.3		165	15179.1		165	16048.8		165	28370.5		165	16606.8		165	15262.2		165	16558.1		165	33138		165	15944		165	16626.9		165	25722.4		165	16553.3			165	17303		165	17610.3
	166	26892.7		166	34075.8		166	16843.4		166	15171.9		166	16073		166	29805.1		166	16596		166	15270.1		166	16625.3		166	33912.7		166	15921.8		166	16628.9		166	25362.4		166	16614.7			166	17275		166	17572.9
	167	27068.3		167	34745.9		167	16827.2		167	15168		167	16079		167	30389.2		167	16526.1		167	15272.5		167	16618.8		167	33120		167	15870.9		167	16646.8		167	27210.6		167	16605.6			167	17235.8		167	17511.8
	168	29703.3		168	36605.4		168	16817.8		168	15121.2		168	16107.2		168	31986.1		168	16505.6		168	15271.5		168	16629.3		168	30469		168	15869.6		168	16633.5		168	26816.7		168	16621.4			168	17234.9		168	17484.8
	169	28274.9		169	36218.2		169	16856.5		169	15175		169	16053		169	31620.2		169	16472.6		169	15316.7		169	16634.3		169	29956.2		169	15780.1		169	16625.5		169	26821.2		169	16622.9			169	17180.5		169	17499.9
	170	28946.5		170	37627.6		170	16847.4		170	16016.2		170	16082.2		170	32217.1		170	16429.5		170	15231.6		170	16623.1		170	34373.1		170	15817.9		170	16699.3		170	27629.2		170	16600.7			170	17224.7		170	17466.2
	171	25253.3		171	36307.6		171	16830.5		171	18242		171	16114.2		171	32609.8		171	16379		171	15295.7		171	16689.9		171	35243.2		171	15791.2		171	16663.4		171	26710		171	16654.4			171	17184.2		171	17363.1
	172	24804.9		172	36448.4		172	16816.7		172	14999.4		172	16086.2		172	33168.5		172	16342.1		172	15277.8		172	16612		172	34374.1		172	15727.2		172	16731		172	27239.5		172	16592.5			172	17205		172	17298.5
	173	25307.4		173	36380.4		173	16821		173	16093.3	173	173	16100		173	32356.9		173	16309.2		173	15283.6		173	16584		173	32463.1		173	15728.5		173	16720.1		173	28430.3		173	16595.9			173	17254.8		173	17324.6
	174	24014.8		174	35738.4		174	16825.4		174	15893.2		174	16026.2		174	32338.5		174	16291.6		174	15291		174	16543.3		174	34272.4		174	15694.7		174	16713.6		174	29170.3		174	16577.8			174	17297.4		174	17279.3
	175	23906.2		175	35343.4		175	16836.8		175	17838.3		175	16045.7		175	30468.2		175	16482.3		175	15258.6		175	16534.9		175	35438.7		175	15681.7		175	16694.3		175	28794.8		175	16575.5			175	17295.1		175	17267.5
	176	23805.1		176	34652.8		176	16856.3		176	21531.3		176	16125.7		176	32159.4		176	16239.3		176	15257		176	16528.4		176	31589.7		176	15815.2		176	16751.6		176	27988.2		176	16599.5			176	17266.8		176	17258.4
	177	24396.4		177	35792.1		177	16838.7		177	21682.5		177	16090.1		177	32098.8		177	16257.8		177	15268.8		177	16454.3		177	32380.1		177	15780.9		177	16741.8		177	28040.1		177	16530.8			177	17251.6		177	17192.6
	178	25711.4		178	35689.6		178	16903.3		178	23517.5		178	16099		178	30482		178	16244.1		178	15301.6		178	16535.2		178	31078.6		178	15845.9		178	16768.2		178	28464.4		178	16581			178	17290.2		178	17194.1
	179	25939.6		179	36875.4		179	16936.4		179	23685.3		179	16082.3		179	32930		179	16254.6		179	15262.4		179	16542.8		179	30326.2		179	15837.5		179	16762.1		179	29765.1		179	16564.2			179	17258.8		179	17102.6
	180	27803		180	37351.5		180	16933		180	25785		180	16075		180	32315		180	16239		180	15237.5		180	16511.5		180	31082		180	15772		180	16785.5		180	28020.8		180	16555			180	17252.5		180	17044.5
	181	26287.5		181	36417.2		181	16968.9		181	26822.8		181	16035.7		181	32909.7		181	16250.9		181	15221		181	16585.9		181	31585.6		181	15750.6		181	16783.8		181	28897.1		181	16541.2			181	17281.6		181	17252.9
	182	26858.1		182	35782.7		182	16970.6		182	25716.7		182	15998		182	32718.6		182	16241.4		182	15214.4		182	16533.8		182	32673.7		182	15669.4		182	16771		182	27950.3		182	16530.3			182	17320.7		182	19972.6	182
	183	27769.2		183	37887.9		183	16917.1		183	27405.2		183	15924.4		183	33330.1		183	16211.9		183	15252		183	16478.4		183	37787.6		183	17246.8		183	16701.3		183	29912.9		183	16451.8			183	17245.1		183	19771.2
	184	28830.1		184	35969.4		184	17000		184	27044		184	15942.1		184	32170.3		184	16179.9		184	15259.6		184	16503.4		184	34821.7		184	15733.5		184	16747.2		184	30745.6		184	16499			184	17299.8		184	22045.5
	185	28022.4		185	35516.7		185	16961.1		185	27251.1		185	15892.9		185	32480		185	16138		185	15214.2		185	16446.2		185	36509.9		185	15690.1		185	16746.3		185	29732.4		185	16417			185	17222.8		185	24490.7
	186	24907.4		186	33731.5		186	16950.3		186	28131		186	15994.3		186	32457.6		186	16115.6		186	15291.6		186	16452.2		186	36275.8		186	15672.1		186	16721.8		186	30229.8		186	16385.9			186	17191.7		186	27478.8
	187	26790.4		187	31489.6		187	16937.8		187	29301.1		187	16821	187	187	34478		187	16095.6		187	15300.3		187	16494.6		187	35325.8		187	15681.8		187	16711.9		187	29306.9		187	16373.7			187	17252.3		187	28869.9
	188	26233.5		188	33305.3		188	16921.2		188	32697.7		188	18750.1		188	33644.4		188	16079.8		188	15285.3		188	16496.7		188	33418.4		188	15673.5		188	16689.6		188	29748.8		188	16360			188	17181.8		188	27850.7
	189	25645.6		189	31804.3		189	16916.5		189	34456.2		189	18918.3		189	32922.3		189	16030		189	15313.8		189	16568		189	28501.2		189	15571.3		189	16713		189	29867.6		189	16424.2			189	17198.7		189	27588
	190	25038.8		190	31200.6		190	16886.9		190	32419.7		190	20414.1		190	33374.4		190	16052.5		190	15275.7		190	16511.1		190	32044.5		190	15589.3		190	16712.1		190	29954.3		190	16360.5			190	17210.8		190	28611.7
	191	26881.7		191	33929.6		191	16910.6		191	33270.4		191	21504.5		191	33162.7		191	15977.7		191	15289.2		191	16538.4		191	29950.8		191	15562		191	16620.5		191	29991.1		191	16361.7			191	17140.7		191	28464.1
	192	25690.8		192	31315.5		192	16890		192	33398.1		192	22277.5		192	32285.4		192	15989.8		192	15233.8		192	16461.5		192	29480.1		192	15583.9		192	16576.5		192	29719.8		192	16342.1			192	17220.9		192	29443.3
	193	25745.7		193	32401.9		193	16825.8		193	34048.6		193	22972.9		193	32074.3		193	15934		193	15223.1		193	16477.8		193	32371.9		193	15581		193	16575.6		193	29700.5		193	16350.8			193	17175.4		193	28700.4
	194	24871.7		194	32305.7		194	16795.5		194	35285.8		194	22855.9		194	31341.8		194	15918.1		194	15210.1		194	16445.1		194	30785.6		194	15525.9		194	16571.7		194	29641.7		194	16335.7			194	17169.7		194	28085
	195	24974.4		195	31045.8		195	16843.8		195	35802.5		195	24114.2		195	31180.5		195	15861.6		195	15196.4		195	16404.4		195	29134.4		195	15521.1		195	16564.8		195	29973.3		195	16329.6			195	17124.9		195	28877.1
	196	24191.1		196	30267		196	16825.8		196	34939.5		196	24162.9		196	32285.4		196	15822.7		196	15180.1		196	16430.8		196	28054.2		196	15506.1		196	16550.8		196	30604.4		196	16276.5			196	17114.4		196	29273.3
	197	23245.9		197	27676.3		197	16815.2		197	37405.1		197	24558.9		197	31238.2		197	15839.3		197	15173.7		197	16418.9		197	30936		197	15493.6		197	16570.6		197	29830.8		197	16293			197	17125.7		197	29331.9
	198	22954.8		198	29490.3		198	16751.6		198	39319.9		198	25623.2		198	31601.5		198	15812		198	15140.8		198	16371		198	33094.7		198	15478.1		198	16519.9		198	29588.9		198	16245.8			198	17008.9		198	29416.7
	199	23177.6		199	29677.6		199	16772.3		199	39190.3		199	25907.2		199	32373.4		199	15806.6		199	15114.9		199	16326.2		199	31865		199	15474.7		199	16542.6		199	30751		199	16225			199	17011.1		199	29103
	200	22790.5		200	29891.8		200	16792.2		200	38226.9		200	26205.3		200	31327.3		200	15782		200	15132.2		200	16307.8		200	29922.1		200	15419.3		200	16541.6		200	30383.4		200	16206.4			200	16948		200	28603.6
	201	22475.2		201	28933.5		201	16791.3		201	39006.3		201	24626.1		201	30417		201	15748.9		201	15086.7		201	16274.9		201	28460.8		201	15432.7		201	16506		201	30670.1		201	16200.8			201	16916.9		201	29164.8
	202	22193.6		202	30339.3		202	16813		202	39219		202	26929.9		202	31402.6		202	16014.5	202	202	15142.2		202	16260.6		202	30042.5		202	15384.6		202	16460.7		202	30867.9		202	16169.6			202	16891.6		202	29486.7
	203	22029		203	29477.3		203	16789.1		203	38810.5		203	26805.4		203	32215.2		203	18112.2		203	15127.1		203	16283.8		203	26466.5		203	15873.4	203	203	16425.3		203	30723.7		203	16163.7			203	16867.8		203	29168.3
	204	20850.4		204	34914		204	16795.9		204	39914.4		204	27758.5		204	33199		204	18026.5		204	15105.3		204	16260.3		204	27452.5		204	19782.7		204	16431.2		204	30612.5		204	16153.1			204	16824.5		204	29687.1
	205	20413.7		205	34638.6		205	16735.3		205	39645.7		205	27594.7		205	32502.9		205	20387.1		205	15138.4		205	16286.1		205	28887.8		205	19559.9		205	16365.1		205	30177.1		205	16073			205	16759.7		205	28838.1
	206	21398.7		206	35126.9		206	16731.7		206	39985.8		206	28120.2		206	32711		206	19569.7		206	15076.3		206	16216.5		206	32451.9		206	22335.6		206	16384.6		206	29343.4		206	16031.7			206	16729.4		206	29610.1
	207	20974.6		207	33691.9		207	16744.5		207	40880.4		207	26929.6		207	32471.3		207	19510.6		207	15119		207	16256.2		207	32318.1		207	23011.4		207	16382.8		207	30752.8		207	16042.6			207	16743.8		207	29052.2
	208	21104.6		208	34513.7		208	16764.4		208	41261		208	26977.4		208	33144.3		208	19719.2		208	15126.6		208	16193.4		208	30889.3		208	22793.9		208	16370.9		208	31265.6		208	16492.2			208	16733.2		208	29164.9
	209	21249.3		209	33714.4		209	16717		209	40300.5		209	27132.2		209	32014.1		209	21088.3		209	15136.8		209	16218.2		209	28320		209	21981.2		209	16362.5		209	31333.3		209	15981.9			209	16812		209	29201.4
	210	22186.1		210	33746.1		210	16752.6		210	41658.6		210	26064.7		210	32562		210	24185.2		210	15144.1		210	16198		210	27321.4		210	23736.6		210	16369.1		210	32118.3		210	15944.2			210	16734.9		210	29333.9
	211	20191.2		211	30456.2		211	16746		211	40968.5		211	26225.6		211	33342		211	23363.1		211	15129		211	16195.7		211	27013.8		211	22736.9		211	16350.3		211	31280.9		211	15992.7			211	16641.3		211	29804.3
	212	18300.7		212	33454.1		212	16694.5		212	40560.8		212	27870.6		212	32442.7		212	23715.7		212	15114.4		212	16189.5		212	30109.1		212	23985.4		212	16313.8		212	31449.8		212	15892.8			212	16641.9		212	29747.3
	213	17890.6		213	29797.1		213	16673.5		213	40526.1		213	27191.5		213	33295.5		213	21960.7		213	15087.2		213	16193.3		213	29341.7		213	25124.4		213	16338.1		213	31985.8		213	15871.7			213	16617.4		213	29288.6
	214	18823.9		214	27467.9		214	16612.8		214	41659		214	28618.4		214	33514.2		214	21678.7		214	15137.2		214	16141.5		214	28061.7		214	25415		214	16269		214	32262.6		214	15876.7			214	16628		214	28578.1
	215	16334.1		215	27707.3		215	16591		215	42019.5		215	26542.9		215	32564.4		215	23968.9		215	15069.9		215	16135.2		215	29607.6		215	25608.2		215	16219.5		215	32266.4		215	16687.3	215		215	16906.2		215	28174.4
	216	15831	216	216	29630		216	16600.1		216	41957.7		216	26286.6		216	33360.6		216	25608		216	15087.4		216	16125.8		216	30531.1		216	26624.8		216	16234.5		216	31611.8		216	16572.7			216	19078.1	216	216	27717.1
	217	15187.3		217	28727.4		217	16608.4		217	42781.4		217	26538.1		217	33845.5		217	24866.3		217	15082.1		217	16101.5		217	33196.2		217	26008.9		217	16205.9		217	31843.1		217	19532.2			217	20414.6		217	27729.1
	218	15051		218	30297.9		218	16625.8		218	43049.8		218	27599.2		218	33744.4		218	26928.2		218	15101.7		218	16066.3		218	31221.9		218	26745.9		218	16198.3		218	32568.9		218	17763.7			218	21719.5		218	27742.5
	219	15301.8		219	29204.5		219	16633.5		219	43391		219	27746.1		219	33231.6		219	26087.1		219	15128.3		219	16089.5		219	29209.2		219	27771		219	16177.8		219	30880.2		219	21297.7			219	23401.2		219	27756.4
	220	15048.2		220	30215.3		220	16659.6		220	43853.3		220	27836.8		220	33937.1		220	27803.5		220	15056.6		220	16034.4		220	29143.7		220	28364.4		220	16182.4		220	31257.3		220	25338.2			220	22464.6		220	27558.4
	221	15060.6		221	28494.4		221	16668.9		221	43767.1		221	26977.2		221	33416.7		221	27263		221	15895.1		221	16078.4		221	33341.7		221	28137.4		221	16108.9		221	30391.7		221	24881			221	24492.2		221	26698.4
	222	15006.7		222	25747		222	16581.1		222	44225.4		222	27840.1		222	34550.5		222	27815.3		222	15115.2		222	15999.8		222	33448.3		222	29266.6		222	16157.6		222	30729.8		222	24576.9			222	26689.9		222	26154.9
	223	15017.8		223	24671.5		223	16575.4		223	43623.7		223	29250.4		223	33622		223	29067.5		223	15134.2		223	16010.6		223	33412		223	29602.2		223	16126.3		223	30379.6		223	25746			223	28613.6		223	25759.8
	224	15031		224	24809.4		224	16573.2		224	44454.3		224	28308.9		224	33863.4		224	28012.2		224	15158.2		224	15984.7		224	32923.2		224	30480.8		224	16061.5		224	30532.7		224	27864.9			224	28426.5		224	25937.5
	225	15026.5		225	24619		225	16566		225	44766.5		225	27283.3		225	34311.6		225	32186.5		225	15073.8		225	15932.9		225	34899.3		225	30611.8		225	16044.7		225	30598.1		225	28085.7			225	28700.2		225	26375.7
	226	15001.7		226	26132.7		226	16567.6		226	43712		226	27387.1		226	33469.5		226	30826.9		226	15732.4	226	226	15939.3		226	31657.7		226	31162.7		226	16014.1		226	30408.8		226	28662.9			226	28435.5		226	26204.9
	227	15065.5		227	25964.3		227	16491.9		227	43371.8		227	27743.6		227	33975.8		227	29561.3		227	16906.7		227	15901.6		227	34911.4		227	30467.3		227	16052.3		227	30556.7		227	28636.9			227	28342.5		227	26288.8
	228	15074.7		228	27778		228	16482.4		228	44792.8		228	27740.9		228	33968.4		228	30877.2		228	17837		228	15886.4		228	32799.4		228	30199.6		228	15965.9		228	29979.6		228	29351.3			228	28547.9		228	26973.5
	229	15035.4		229	33127.8		229	16424.6		229	44360		229	27097.3		229	34594.2		229	31173.5		229	18211.5		229	15888.7		229	35094.7		229	30294.2		229	15899.8		229	29732.6		229	30010.3			229	29338.1		229	26714.2
	230	15051.7		230	33931.7		230	16434.6		230	44048		230	27138.5		230	33515.3		230	31326.6		230	18878.6		230	15862.1		230	31958		230	30988		230	15781		230	30345.8		230	29732.7			230	30329.8		230	26233.4
	231	15108		231	34518.9		231	16388		231	43132.7		231	27729.7		231	32882.3		231	30989		231	19878.7		231	15848.8		231	32427.5		231	32243.6		231	15773.8		231	30911.2		231	30865.7			231	30482.9		231	26756.7
	232	15083.8		232	33243.6		232	16384.4		232	43983.5		232	27943.5		232	33150.9		232	34599.5		232	20523.9		232	15847.1		232	33121.8		232	32945.7		232	15796.8		232	31140.3		232	31399.1			232	30426.4		232	26249.6
	233	15097.3		233	33388.2		233	16352.7		233	44413.4		233	26720.8		233	34813.6		233	35851.8		233	21381		233	15836.9		233	32347.2		233	32746.4		233	15740.2		233	30786.6		233	31424.8			233	31072.4		233	26056.7
	234	15125.9		234	31993.7		234	16367.1		234	43976		234	28613		234	33596.1		234	35198.5		234	21628		234	15809		234	27997.2		234	33152.2		234	15648.8		234	31094.6		234	31548.7			234	31174.4		234	25500.4
	235	15080.9		235	31459.7		235	16304.4		235	44197.5		235	27716.9		235	34211.1		235	37275		235	20724.6		235	15773.7		235	29662.2		235	32609.3		235	15607.5		235	31442.4		235	32918.3			235	32026.9		235	25818.9
	236	15131.3		236	30029.5		236	16326.2		236	43955.1		236	25778.5		236	34078		236	38087.7		236	21350.3		236	15774.9		236	30750.8		236	33950.5		236	15526.9		236	31283.6		236	33040.8			236	32762		236	25536.8
	237	15169.3		237	28177.5		237	16301.2		237	43864.2		237	26182.8		237	34120.9		237	39506		237	23230.4		237	15743.5		237	32365.1		237	33999		237	15529.1		237	30989.3		237	32854.3			237	32396.6		237	25564.9
	238	15135.1		238	28329.1		238	16263.1		238	43425.6		238	26481.9		238	35388.9		238	38308.3		238	23108.6		238	15710.9		238	33262.9		238	34323.2		238	15445.2		238	31978.7		238	33283.9			238	32197.8		238	25309.3
	239	15151		239	27927.6		239	16211.1		239	43132.1		239	28143.2		239	34032.4		239	31843.2		239	23016.1		239	15654		239	32378.9		239	34435.8		239	15425.8		239	32255.8		239	34189.2			239	32257.4		239	25561.7
	240	15178		240	27561		240	16255.6		240	43331.8		240	30308.6		240	33973.1		240	31599.3		240	21550.9		240	16063.5		240	31317.2		240	34805.4		240	15355.5		240	31668		240	34035.3			240	32411.3		240	25463.3
	241	15190.7		241	27080.8		241	16181.3		241	43011.9		241	29424		241	34325.9		241	32995.5		241	24257.9		241	16614.8	241	241	31315.6		241	34858.7		241	15364.8		241	31740.3		241	34446.6			241	31655.7		241	25639.5
	242	15240.1		242	28053.9		242	16144.1		242	43038.6		242	29447.2		242	33556.9		242	34680.2		242	25642.4		242	17790.6		242	32194.7		242	34491.9		242	15316.9		242	31832.1		242	34887.8			242	32106.9		242	25844.5
	243	15270.6		243	28392.5		243	16129.5		243	43325		243	26116.5		243	33694.3		243	37795.1		243	28789.2		243	17256.3		243	32031.1		243	33603.6		243	15258.6		243	31858.3		243	35511			243	32312.1		243	25765.8
	244	15230.3		244	28177.2		244	16129.7		244	43590.3		244	26934.1		244	33867.1		244	35019.9		244	28361.9		244	19521.4		244	32455.8		244	34756.2		244	15225.1		244	32646.9		244	35253			244	33645		244	25781
	245	15336.8		245	28344.4		245	16130.4		245	43925.3		245	27530.9		245	33922.1		245	36483.2		245	26981.7		245	20649.5		245	32278.9		245	34652.8		245	15176.8		245	32300.6		245	35158.4			245	33737		245	25689.7
	246	15274.9		246	28035.4		246	16102.7		246	43874		246	28044.9		246	33163.6		246	35662.1		246	23615.9		246	23040.6		246	33636.7		246	34207.6		246	15181.8		246	33526.8		246	36481.7			246	33553.8		246	25248.9
	247	15353.6		247	27179.3		247	16062.5		247	43926.8		247	28847.7		247	33663.7		247	34144.7		247	24656.8		247	23846.2		247	33650.5		247	34932.4		247	15216.4		247	34971.6		247	35928.5			247	33118.8		247	25672.3
	248	15282.5		248	27043.9		248	16186.1	248	248	44419.8		248	28904.2		248	33145.9		248	34995.2		248	25129.1		248	23121.5		248	33626.4		248	33999.5		248	17172	248	248	35204		248	36698.3			248	32657.7		248	25275.4
	249	15306.3		249	27541		249	18375.8		249	43017		249	26909.7		249	33126.9		249	33467.9		249	26739		249	24459.7		249	33541.8		249	33506.5		249	17762.4		249	33850.7		249	34533.3			249	32542.9		249	25185.7
	250	15305.6		250	27746.3		250	21164.7		250	45015.4		250	26839.3		250	33072.9		250	34423.4		250	26915.2		250	25763.1		250	33850.1		250	33001.1		250	18915.5		250	33090.8		250	35766.9			250	32249.5		250	25913.9
	251	15304.8		251	26794.2		251	22076.8		251	45127.8		251	26066.7		251	32927.6		251	31783.7		251	26212.6		251	25283.9		251	33264.7		251	33722.9		251	19106.6		251	32326.8		251	36906.2			251	32392.2		251	25787.8
	252	15308.1		252	27218.9		252	22986.4		252	45406		252	26887.2		252	32760.1		252	31726		252	29412.6		252	27292		252	33510.6		252	34499.2		252	20475.1		252	32427.9		252	37255.1			252	32934		252	26426.4
	253	15319.7		253	27137		253	23979.3		253	45635.9		253	25658.2		253	32812.2		253	32991.4		253	29033.5		253	27989.1		253	33362.7		253	34367.9		253	19746.7		253	33058		253	38278.3			253	33325		253	25720.3
	254	15255.7		254	26847.9		254	24971.9		254	44928.9		254	26098.6		254	32762.8		254	33552.8		254	27850.6		254	28050.7		254	33637.5		254	33724.2		254	20987.5		254	33243.4		254	37926.9			254	33212.1		254	25918.3
	255	15316.5		255	25219.5		255	25099.1		255	44444.6		255	26275.5		255	33039.5		255	34177.4		255	29479.9		255	28952.6		255	33104.2		255	32564.7		255	21115		255	32779.9		255	37371.1			255	33586.2		255	24887.1
	256	15329		256	25731.1		256	25393.5		256	44246		256	26786.6		256	33387.6		256	32350.3		256	29957.9		256	29336.1		256	33449.2		256	32218.7		256	21360		256	32170.5		256	38163.6			256	32897.5		256	25517.5
	257	15249.4		257	25622.9		257	26161.1		257	44103.9		257	26271.9		257	33804.6		257	34274.7		257	31035.3		257	28765.9		257	32827.2		257	33290.3		257	23207.1		257	32263.4		257	38435.1			257	34065.1		257	25420.2
	258	15256.1		258	25333.7		258	26053.3		258	44415		258	26535.5		258	33375.5		258	32886.1		258	31910.5		258	29446.4		258	32747.4		258	33255.9		258	22811.3		258	32053.5		258	38817.1			258	34279.3		258	25168.8
	259	15325.1		259	24432.2		259	26773.8		259	44732.6		259	26665.6		259	33769		259	36193.6		259	32340.6		259	28943.3		259	32952.5		259	34044.8		259	23440.6		259	33186.1		259	38343.3			259	34255.2		259	24846.8
	260	15298.8		260	24480.5		260	26562		260	44705.4		260	27207.4		260	32967.8		260	38134.9		260	32518.8		260	29348.1		260	32012.4		260	34262.4		260	23586.6		260	32824.7		260	38531.7			260	33945.2		260	25276.3
	261	15300.3		261	25721.7		261	26815.8		261	44290.2		261	26921.2		261	32285.5		261	38392.9		261	28328.1		261	30743.6		261	32565.8		261	34399.8		261	23478.2		261	32535.4		261	38278.9			261	33218.5		261	25285.1
	262	15357.5		262	23191.2		262	26550		262	45441.3		262	26911		262	31809.3		262	34806.3		262	30910.5		262	29939.5		262	32618.2		262	34959.2		262	24374.4		262	32783.5		262	37870.6			262	33347.9		262	24968.4
	263	15349.4		263	23691.3		263	26943.2		263	45963.8		263	26867.5		263	31808.5		263	35058.2		263	30262.8		263	30702.1		263	33729.5		263	34216.5		263	25572.6		263	32193.2		263	38272.3			263	34274.6		263	24134.5
	264	15373.8		264	24020.5		264	27948.8		264	44408.9		264	27809.9		264	32145.7		264	36816.9		264	27694.8		264	30235.9		264	32940		264	33614.6		264	23912.4		264	30385.7		264	39129.5			264	34414.6		264	24309.9
	265	15316.2		265	23252.5		265	28219.8		265	46306.4		265	27958.4		265	33027.8		265	35184.1		265	27987.6		265	30384.4		265	32705.9		265	34010.9		265	24054.5		265	31780		265	38327.4			265	34100.5		265	23947.1
	266	15317.4		266	24136		266	28447		266	46095.3		266	28251.5		266	32122.3		266	30756.8		266	29572.2		266	30410.5		266	31041		266	33126.8		266	24371.8		266	31693.7		266	38399.9			266	34974.8		266	24983.2
	267	15304.1		267	22944.2		267	28122		267	46817.3		267	28169.1		267	31781.5		267	32341		267	29589.4		267	30095.3		267	30631.3		267	34430.4		267	24291.1		267	31142.2		267	38183.6			267	35104.2		267	24771.6
	268	15342.7		268	19613.1		268	28386.5		268	45899.2		268	27549.3		268	31922		268	31014.4		268	28365.6		268	29081.6		268	31009.2		268	34235.1		268	26404.9		268	30366.9		268	37873			268	35610.7		268	25056.9
	269	15325.9		269	20253.4		269	28369.6		269	46494.5		269	27809.4		269	29763.3		269	33945.9		269	29997.6		269	30802.7		269	30561.3		269	34743.2		269	25685.2		269	31486.4		269	38376.2			269	35606.9		269	24692.8
	270	15342		270	16483.5	270	270	28185		270	47206		270	26697		270	29671		270	34540		270	28586.2		270	31391.5		270	27135		270	35709		270	24953.5		270	31219		270	38423			270	35977		270	26401.5
	271	15364.9		271	15296		271	27696.8		271	46836.4		271	26929		271	28393.7		271	33222.6		271	27872.4		271	31586.2		271	27471.2		271	35883.5		271	28180.4		271	30304.8		271	38876.7			271	36269.9		271	24721.4
	272	15338.7		272	15646.6		272	27946.4		272	45113.3		272	28395		272	29303.7		272	32574.2		272	28724.8		272	31409.3		272	27503.6		272	36837.1		272	28558.5		272	29164.3		272	39028.3			272	35755.4		272	25449
	273	15336.3		273	15417.6		273	27946.5		273	45839		273	28175.7		273	27819.2		273	35115.5		273	31784.6		273	33498.5		273	29712.5		273	38127.6		273	27700.8		273	30447.5		273	39202.5			273	36315.9		273	26787.6
	274	15371.1		274	15104.2		274	27771.9		274	45808.9		274	28643.1		274	25131.4		274	34920.1		274	31000.7		274	30694.3		274	26007.6		274	39287.6		274	27343		274	28823.5		274	39058.6			274	36010.9		274	26700.2
	275	15396.7		275	15090.9		275	29152.8		275	46443.7		275	28615.2		275	24553.1		275	33597.2		275	31324.1		275	30485.7		275	19843.8		275	38504.5		275	27936.8		275	28796.8		275	39416.3			275	36535.5		275	24722.9
	276	15403.8		276	15343		276	29694.8		276	46310.1		276	28635.4		276	25026.9		276	33256.4		276	32879.6		276	31200.9		276	16117.4		276	38113.6		276	27934.5		276	29427.1		276	39215.1			276	35921.2		276	24359.7
	277	15424.4		277	15177.1		277	30048.3		277	48010.1		277	28372.5		277	25691.7		277	30301.3		277	32806.9		277	31844.9		277	16893.9	277	277	38160.5		277	27556.6		277	29556.2		277	40336.9			277	36800.8		277	25198.7
	278	15404.1		278	15196.9		278	29206.3		278	48899.6		278	28797.1		278	18701.7		278	32224.2		278	33638.2		278	32477.4		278	15076.3		278	38512.3		278	30063.8		278	29825.1		278	40783.7			278	36214.7		278	25668.3
	279	15419.2		279	15131.8		279	29941.6		279	47615.3		279	28910.4		279	17203		279	34350.4		279	34170.8		279	32352.8		279	15209.7		279	38436.9		279	27572.2		279	29375.6		279	40200.6			279	35819.2		279	25476.5
	280	15400		280	15192.9		280	29767.4		280	47452.2		280	28336.6		280	15566.2		280	34429.4		280	33448.2		280	32323.7		280	15098.4		280	39643.6		280	26640		280	29715.7		280	41381.7			280	35905.9		280	27346.6
	281	15398.1		281	15206.4		281	30922.6		281	48426.1		281	29446.9		281	16277.8		281	31565.8		281	32400.8		281	32434.5		281	15151.5		281	39736.9		281	26856.8		281	29369.9		281	40704.3			281	36620.4		281	27819.5
	282	15387.3		282	15265.4		282	31300.1		282	47754.4		282	29475.2		282	18179.5		282	30750.1		282	34494		282	32901.7		282	15185.9		282	40158.5		282	28813.4		282	29751.4		282	41518.5			282	36439		282	26084.5
	283	15349.5		283	15253.7		283	31801.4		283	48574.2		283	29270.2		283	18208.2		283	30010.5		283	33656.2		283	33669.6		283	15222.2		283	41173.2		283	29623.2		283	29389.6		283	42213.3			283	36779.9		283	25606.1
	284	15354.2		284	15271.4		284	31936.8		284	45284.9		284	28965.2		284	18547.2		284	31602.6		284	34832.4		284	32909.9		284	15239.2		284	40628.9		284	28382.1		284	30230.5		284	41163.3			284	36306.8		284	25959
	285	15372.3		285	15342.2		285	32075		285	46023.9		285	29783.3		285	18559.3		285	32101.9		285	32505		285	32190.4		285	15261.2		285	40663.6		285	29673.4		285	30560.6		285	41393.1			285	36901.3		285	26812.3
	286	15322.3		286	15360.6		286	32886.6		286	47070.4		286	30168.4		286	16087.2		286	31501.5		286	34281.3		286	35267.2		286	15266.8		286	39181.6		286	28331.3		286	31356.3		286	41518.9			286	36379.5		286	26836
	287	15412.7		287	15302.5		287	33913.4		287	45984.7		287	31206.5		287	16675.5		287	33109.3		287	34323.8		287	34788.3		287	15265.4		287	39928.2		287	29722.5		287	31026.3		287	41928.4			287	36692.7		287	29013.5
	288	15340.3		288	15300.1		288	33989.3		288	45471.6		288	30142.2		288	16947.8	288	288	31728.7		288	30784.8		288	34581.1		288	15299.5		288	40312.9		288	30604.7		288	30771.9		288	41547.6			288	36313		288	28153.3
	289	15388.4		289	15272		289	34309		289	46185.4		289	30534.5		289	15158.2		289	31943.6		289	33681.4		289	36151.3		289	15296.6		289	40915		289	33530.2		289	31032.9		289	41680.4			289	35750.3		289	27073.4
	290	15386.9		290	15261.7		290	34541.7		290	47255.8		290	30154.2		290	15147.5		290	31627.7		290	34682.2		290	35615.9		290	15349.7		290	40232.6		290	33341.2		290	31155.8		290	43274.8			290	35394.5		290	27359
	291	15413.6		291	15241.9		291	34773.8		291	48710.4		291	30234.4		291	15443.3		291	30630.8		291	35367.1		291	36529.4		291	15353		291	39673		291	32087.2		291	32505.3		291	42836.7			291	36312.6		291	27754.7
	292	15408.6		292	15225.6		292	35128		292	47689.4		292	30735.2		292	15195.7		292	30924.3		292	36230.9		292	35199.2		292	15396.1		292	40887.5		292	32250.6		292	31945.3		292	42705.8			292	36669.1		292	28038.8
	293	15416.1		293	15225.7		293	35542.5		293	47612.3		293	30948.4		293	15194		293	32521.8		293	37743.5		293	35915.8		293	15367.6		293	41744.7		293	29116.2		293	32572.7		293	43192.5			293	36949.7		293	28228.1
	294	15451.2		294	15250		294	35656.8		294	46926.5		294	31764.9		294	15275.9		294	34119.9		294	37303.9		294	36165.4		294	15379.1		294	43588.2		294	30305.3		294	30872.1		294	41919.9			294	37111.2		294	29596.5
	295	15450.9		295	15297.9		295	35420		295	46962.9		295	31522.2		295	15329.3		295	32640.9		295	36794.3		295	35290.5		295	15388.1		295	43543.9		295	29739.9		295	32125.8		295	42036.1			295	36934.9		295	29534.2
	296	15462.1		296	15279.8		296	36387.8		296	46787.4		296	32072.2		296	15352.9		296	32656.8		296	37981.2		296	36179.7		296	15454.4		296	44428.2		296	31612.1		296	32261.8		296	43772.4			296	36764		296	28751.7
	297	15456.6		297	15351.8		297	36130.3		297	47556.9		297	31994.2		297	15370.3		297	31015.7		297	38685.6		297	34745.8		297	15431.9		297	43616.7		297	31732.3		297	31782.9		297	42315.2			297	36407.7		297	28949.4
	298	15497.8		298	15351.5		298	36269.5		298	44925.1		298	32815.8		298	15425.9		298	31536.1		298	39069.2		298	36264.4		298	15413.6		298	44064		298	27338.1		298	32398.1		298	41181.3			298	36085.5		298	28556
	299	15506.1		299	15404.1		299	37770.9		299	48697		299	33017.1		299	15517.6		299	34678.9		299	39073.9		299	37183.3		299	15454		299	45263.7		299	28119.9		299	32457.2		299	40682.5			299	35761.3		299	29283.1
	300	15450.9		300	15365.3		300	38565.1		300	47411.8		300	33203.5		300	15561.9		300	33281.9		300	37414.7		300	37191		300	15503.3		300	45910.1		300	31741.8		300	32606.8		300	41312.6			300	36636.7		300	29383.1
	301	15454.6		301	15396.6		301	40207.6		301	46142.4		301	32587.9		301	15632.8		301	33965		301	36264.1		301	38373.6		301	15486.5		301	44925		301	30903.5		301	30807.8		301	41176.2			301	37351.2		301	29191.1
	302	15461.9		302	15409.4		302	39177.8		302	46043.9		302	33178.2		302	15631.9		302	34086.4		302	36258.4		302	36805.3		302	15498.3		302	46350.9		302	30858.3		302	30365.5		302	40889.7			302	37386.8		302	29237.5
	303	15490.7		303	15491.8		303	38969.4		303	48910.6		303	33377.9		303	15717.1		303	34085.9		303	32384.5		303	36209.2		303	15570		303	45382.7		303	27075.6		303	30809.1		303	42146.9			303	37553.5		303	29872.7
	304	15439.3		304	15550.3		304	39111.6		304	48001.5		304	33657.4		304	15760.2		304	32797.7		304	32621.9		304	38169.8		304	15546.8		304	46488.4		304	29151.4		304	31046.2		304	41968.7			304	37768.5		304	30382.9
	305	15474.7		305	15571.1		305	39405.6		305	49592.9		305	33376.7		305	15767.8		305	33055.3		305	32600.7		305	38168.9		305	15611.8		305	45524.3		305	30099		305	31990.2		305	44063.5			305	38272.7		305	30193.5
	306	15474.3		306	15587.1		306	39705.2		306	48601		306	33163.8		306	15825		306	34128.8		306	32708.5		306	37286.7		306	15665		306	45868.6		306	28703.1		306	30336.9		306	43401.4			306	38022.4		306	29879.2
	307	15461.9		307	15634.9		307	40621.9		307	49141.1		307	32604.3		307	15793.9		307	35557		307	31311.3		307	37367.9		307	15693.4		307	45222.1		307	29604.2		307	30063.6		307	42340.7			307	37869.7		307	31495.8
	308	15468.2		308	15626.9		308	39839.5		308	48048.6		308	32725.6		308	15861.4		308	32888.2		308	32205.8		308	38332.3		308	15753.5		308	45441.6		308	28799		308	29308.4		308	42163.3			308	38077		308	31243.8
	309	15473.3		309	15610.3		309	39779.8		309	48127.2		309	33150.3		309	15886.6		309	35877.8		309	32510.9		309	37988.4		309	15766.7		309	46664.3		309	32494		309	28690.9		309	43560.3			309	38278.9		309	32015
	310	15498.3		310	15651.2		310	41033.1		310	46393.2		310	33167.8		310	15931.1		310	33343.1		310	32801.2		310	39571.8		310	15780.2		310	46211.7		310	31456.4		310	28962		310	43489.6			310	38908.5		310	31805.1
	311	15485.5		311	15604.3		311	42155.6		311	46686.1		311	33189.5		311	15954.2		311	33882.5		311	34603.5		311	37825.8		311	15829.6		311	47037.7		311	32551.2		311	28232.9		311	44289.1			311	38809.2		311	32189
	312	15472.6		312	15656.2		312	41967.3		312	47203.9		312	33369.6		312	15988.9		312	33456.3		312	33936		312	37446.6		312	15871.8		312	47821.1		312	31594.9		312	26960.9		312	43828.9			312	38997.9		312	32832.4
	313	15481.5		313	15619.9		313	42253.4		313	47310		313	33761.9		313	15996.8		313	34412.9		313	33917.6		313	38701.4		313	15919.6		313	47539.9		313	30886.7		313	26709.5		313	44685.2			313	39747.9		313	32250.3
	314	15483		314	15641.3		314	42343.8		314	45456.2		314	34192.8		314	16043.1		314	34450.1		314	32500.3		314	38349.3		314	15931.8		314	48460.7		314	29509.5		314	25651.2		314	44457.6			314	39844.1		314	32670
	315	15535.8		315	15637		315	42351.2		315	46427.7		315	34007.6		315	16080.2		315	32711.6		315	32225.4		315	38070		315	15995.3		315	45379		315	33751.2		315	26494.1		315	45541.6			315	39254		315	32502.1
	316	15521.8		316	15678.6		316	43114.9		316	47483		316	34707.7		316	16080.3		316	34934.8		316	32524.6		316	40134.3		316	16052.1		316	47776.4		316	34102.8		316	26482.5		316	44588.2			316	39384.7		316	32474
	317	15543.9		317	15748.2		317	44288.3		317	46083.6		317	34967.5		317	16132		317	35351.5		317	32655.5		317	39822.9		317	16101.6		317	48638.1		317	32742.3		317	26608.8		317	43896.9			317	39591.7		317	33024.9
	318	15488.4		318	15763.5		318	44143.7		318	47030.2		318	35166.2		318	16183.5		318	36092.9		318	32752.5		318	39947.4		318	16167.8		318	48235.6		318	34433.6		318	25051		318	44668.1			318	39625.3		318	34372.3
	319	15548.3		319	15820.9		319	43626.7		319	47719.2		319	34475.3		319	16250.2		319	35478		319	33858.4		319	40294		319	16238.6		319	46471.7		319	33754.3		319	24787.6		319	45234.9			319	39013.1		319	34819.7
	320	15548.4		320	15822.1		320	44096		320	45945.2		320	34811		320	16274		320	33504		320	33794.6		320	40569.4		320	16269.6		320	48617.7		320	34763.2		320	25088.6		320	43729.6			320	39553.8		320	34420.3
	321	15532.4		321	15866.1		321	43710.3		321	48476		321	34706		321	16273.4		321	33968.2		321	33762.5		321	39757.8		321	16318.8		321	49138.8		321	35999.2		321	25895.1		321	43969.4			321	39026.2		321	34749.3
	322	15532.9		322	15829.9		322	43856.3		322	48653		322	33858.9		322	16351.2		322	34317.3		322	33092.8		322	41118.1		322	16296.9		322	47333.3		322	35030.2		322	23786.9		322	43615.9			322	39091.7		322	35018.6
	323	15516.8		323	15821.2		323	43384.4		323	47300.3		323	34993.5		323	16409.4		323	34803.2		323	33807.3		323	41322.2		323	16338.7		323	47883.1		323	35361.3		323	23242.6		323	43291.7			323	39091.7		323	34831
	324	15474.9		324	15837.5		324	42009		324	47550.7		324	35106.3		324	16396		324	34461.8		324	34634		324	42652.6		324	16320.3		324	47271		324	36476.5		324	19920.4		324	43629.5			324	38873.3		324	34816.4
	325	15481.5		325	15811.4		325	42160.5		325	45626.6		325	35521		325	16418		325	33093		325	33539		325	41616.9		325	16349.9		325	50033.3		325	33814.6		325	19226.2		325	43768.6			325	38559.9		325	34855.8
	326	15518.3		326	15902.9		326	42649.6		326	45558.5		326	34903.5		326	16424.6		326	31875.9		326	35001.3		326	41541.4		326	16409.2		326	51085.2		326	33971.9		326	16228.5		326	43322			326	38839.9		326	34635.4
	327	15569.3		327	15921.1		327	42216.5		327	46067		327	35876.9		327	16444.5		327	32677.2		327	34624.4		327	43499.6		327	16452.1		327	49457.9		327	32909.1		327	16553.5		327	43383.9			327	38301.1		327	35471.1
	328	15550.4		328	15964.5		328	41849.4		328	46336.3		328	33816.4		328	16441.5		328	33547.7		328	34120.8		328	40494.8		328	16490.2		328	49743.6		328	34061.9		328	16342.9	328	328	42929.9			328	38637.1		328	36066
	329	15577.8		329	15959.3		329	43007.2		329	46494.8		329	33640.2		329	16477.4		329	31737		329	34484.2		329	44198.6		329	16548.1		329	48736		329	37042.8		329	15678.1		329	43397.3			329	38882.3		329	36273.9
	330	15572.6		330	16007.1		330	40855.9		330	45112.2		330	32954.9		330	16524.9		330	31919.6		330	36189		330	42403.9		330	16524.6		330	47904.3		330	36482.1		330	15573.9		330	43317.8			330	38817.9		330	37031.6
	331	15600.5		331	16026.2		331	42384.3		331	44835.6		331	32491.8		331	16559.1		331	33884.9		331	34062.6		331	42017.5		331	16604.1		331	48768.8		331	35328		331	15586.9		331	42328.1			331	38917.5		331	36752.7
	332	15662.4		332	16012.1		332	43252.7		332	43846.2		332	32447.2		332	16608.3		332	33895.8		332	36007.7		332	41766.3		332	16624.3		332	49540.9		332	33542.5		332	15584.2		332	42097.2			332	39085.8		332	37084.2
	333	15608.6		333	15988.6		333	43414.5		333	44644.3		333	33814.2		333	16646.8		333	34383		333	35054.7		333	41093.7		333	16609		333	50084.8		333	34010.3		333	15598.8		333	42482.8			333	38665.8		333	35662.2
	334	15605.8		334	16031.8		334	43433.7		334	42200.6		334	32366.3		334	16664.2		334	31762.5		334	35303.3		334	38804.1		334	16617		334	48559.7		334	33559.2		334	15601.8		334	42052.6			334	39119.7		334	35907
	335	15612.5		335	16052.1		335	42154.3		335	39276.2		335	32440.7		335	16691.2		335	31996.9		335	34752.6		335	41543.6		335	16702.6		335	51254.8		335	32109.4		335	15643.6		335	41518.6			335	38851.3		335	35386.2
	336	15634.1		336	16012.7		336	43106.7		336	37168.7		336	31732.3		336	16736.2		336	32512.9		336	35676.1		336	41876.2		336	16665.2		336	48897.4		336	34174.5		336	15702.8		336	41316.7			336	38336.8		336	35845
	337	15624.6		337	16106.1		337	42659.5		337	35700.8		337	32572.6		337	16752.1		337	31125.5		337	34735.1		337	43166.4		337	16662.1		337	48156.1		337	32807.1		337	15697.1		337	42710.8			337	38427.8		337	37149.2
	338	15582.4		338	16110.5		338	43753.9		338	34426.9		338	32304		338	16780.1		338	28717.5		338	35322.5		338	43313.5		338	16638		338	49230.4		338	34179.9		338	15699.9		338	42043.6			338	38821.9		338	36189.6
	339	15592.6		339	16074		339	41616.6		339	35711.4		339	32449.4		339	16835.5		339	31025.8		339	34922.9		339	40761.3		339	16653.2		339	48174.8		339	34505.4		339	15751		339	42306.7			339	39067.8		339	35775.3
	340	15574.9		340	16114.5		340	42258.7		340	33768.5		340	32069.8		340	16783.5		340	31014.5		340	34535.9		340	41596.7		340	16666.6		340	49891.6		340	32575.3		340	15765.4		340	41762.4			340	38993.3		340	36308.4
	341	15621.7		341	16126.1		341	41754.4		341	31592.5		341	31038.1		341	16780.2		341	31584.6		341	35235.1		341	43446.6		341	16689.8		341	50444.9		341	33301		341	15804.4		341	42442.3			341	38171.5		341	35487.7
	342	15658.7		342	16136		342	42292.2		342	32678.5		342	29861.7		342	16868.1		342	32455.6		342	34743.8		342	43548.8		342	16684.7		342	49606.3		342	33050.7		342	15846.9		342	41028.2			342	37963.5		342	36116.7
	343	15679.8		343	16147.8		343	43222.8		343	34183.9		343	29793.8		343	16891.5		343	31710.1		343	33260.3		343	41708.5		343	16774.9		343	47358.2		343	33638.1		343	15826.1		343	40707.9			343	36962.7		343	35951.6
	344	15670.1		344	16184.2		344	43226		344	33345		344	29809.3		344	16915		344	31002.5		344	33659.6		344	41596.1		344	16802.5		344	46672		344	33604.8		344	15809		344	40980			344	37684.3		344	35728.8
	345	15670.5		345	16144.5		345	43248.6		345	28629.2		345	29822.9		345	16957.8		345	32295.4		345	35009.7		345	43772.7		345	16922.9		345	45441.9		345	34071.9		345	15815.3		345	40081.3			345	37362.8		345	34928.7
	346	15699.5		346	16155.5		346	42380.2		346	31802.3		346	28685.9		346	16972		346	33817.1		346	33600.7		346	41023.7		346	16926.4		346	46650.3		346	35448.7		346	15741		346	40063.6			346	36738.7		346	35578
	347	15668.2		347	16153.7		347	44291.1		347	29480.8		347	28048.6		347	17071.9		347	32074.6		347	34425.6		347	41900.3		347	16960.6		347	48385.1		347	34538.8		347	15806.1		347	39796.2			347	36224.9		347	36560.1
	348	15674		348	16166.5		348	43478.4		348	28529.4		348	29468.6		348	17098.5		348	35199.9		348	32992.2		348	40580.2		348	16963.2		348	46553.8		348	35008.6		348	15856.8		348	40274.6			348	35790.1		348	36561.5
	349	15674.1		349	16168.1		349	43433.5		349	26406.8		349	29416.6		349	17065.8		349	32064.8		349	33914		349	44678.4		349	16950.7		349	48158.5		349	35209.9		349	15878.7		349	38912.9			349	36214.7		349	35752.1
	350	15688.6		350	16139		350	43670.4		350	23414.5		350	28460.3		350	17075		350	34158.8		350	33700.3		350	40266.5		350	16974.3		350	47379.9		350	34458		350	15837.8		350	38867.6			350	35422.8		350	35160.4
	351	15650		351	16157		351	43137.7		351	20958		351	28326.5		351	17141.3		351	33702		351	33589.4		351	44581.2		351	17013		351	41850.7		351	33936.7		351	15880.2		351	38566.3			351	35335.4		351	35639.8
	352	15671.4		352	16160.8		352	42660.7		352	24192.2		352	27870.2		352	17140.1		352	33331.8		352	33483.9		352	42217.1		352	16960.3		352	40849.9		352	33034.6		352	15928.9		352	37082.6			352	35550.3		352	35658.3
	353	15678.6		353	16192.3		353	43539.5		353	17832.1		353	26259.7		353	17146.8		353	32240.9		353	33215.2		353	42543.9		353	17032.7		353	43481.6		353	32659.3		353	15997		353	36923.9			353	34649.3		353	35911.5
	354	15691.4		354	16230.7		354	41887.6		354	18080.9		354	27995.2		354	17159.1		354	33561.4		354	32522.3		354	43302		354	17062.2		354	43022.3		354	36290.2		354	16038.4		354	35877.8			354	34651.3		354	35558.4
	355	15722.3		355	16231.7		355	40771.9		355	20126.8		355	27083.1		355	17197.3		355	35465.4		355	32158		355	40517.7		355	17151.1		355	42313.2		355	33526.5		355	16073		355	35392.5			355	34824.5		355	34733
	356	15741.8		356	16206.4		356	41343.3		356	20455.4		356	26044.6		356	17249.3		356	33868.8		356	32683.9		356	40933.2		356	17237.4		356	40717.7		356	33603.3		356	16085.6		356	35553.4			356	35561		356	35706.2
	357	15716.5		357	16199.6		357	41663.3		357	18674.7		357	27056.9		357	17218.7		357	33371.6		357	33207.4		357	40961		357	17232.1		357	37787.7		357	34987		357	16101.8		357	35791.6			357	34282.9		357	35475.3
	358	15780.5		358	16228.1		358	41425.9		358	17172.7		358	25692.7		358	17295.5		358	34132.8		358	33352.2		358	41953.2		358	17266.5		358	39550.9		358	36834.9		358	16083.2		358	35515.9			358	34599.4		358	36114.8
	359	15759.5		359	16223.6		359	41612.9		359	20615.6		359	23499.9		359	17291.9		359	35020.8		359	32868.2		359	40510.2		359	17233.8		359	39222		359	36572.9		359	16103.6		359	34500.9			359	34596		359	34042.2
Degree difference	161			186			187			189			180			170			188			166			199			150			178			181			171			167				199			193
Fraction of 360	0.447222			0.516667			0.519444			0.525			0.5			0.472222			0.522222			0.461111			0.552778			0.416667			0.494444			0.502778			0.475			0.463889				0.552778			0.536111
WT	0.0365052	Stdev
WT	0.490675	Average
WT	0.447222	1
WT	0.516667	1
WT	0.519444	1	1	0.490675	0.00975642	WT
WT	0.525	1	2	0.600463	0.0108548	MZgdf3
WT	0.5	1
WT	0.472222	1
WT	0.522222	1
WT	0.461111	1
WT	0.552778	1	T-test	8.85229e-08
WT	0.416667	1
WT	0.494444	1
WT	0.502778	1
WT	0.475	1
WT	0.463889	1
MZgdf3	0.552778	2
MZgdf3	0.536111	2
MZgdf3	0.586111	2
MZgdf3	0.658333	2
MZgdf3	0.622222	2
MZgdf3	0.6	2
MZgdf3	0.647222	2
MZgdf3	0.602778	2
MZgdf3	0.605556	2
MZgdf3	0.572222	2
MZgdf3	0.580556	2
MZgdf3	0.641667	2
MZgdf3	0.600463	Average
MZgdf3	0.037602	Stdev
[truncated: 22 more columns]
