# Supplementary material for: Gdf3 is required for robust Nodal signaling during germ layer formation and left-right patterning
Source: eLife. 2017 Nov 15;6:e28635. doi: 10.7554/eLife.28635 (PMC5745080; doi:10.7554/eLife.28635)
Supplement: Figure 3—source data 2. [file elife-28635-fig3-data2.xlsx]

## Sheet: Sheet1
Mut	Average	Standard Error of the Mean		PWT	Average	Standard Error of the Mean
0.01	4.50301	0.201488			2.97615	0.0868862
0.02	4.25997	0.189337			2.88862	0.0930701
0.03	4.16908	0.193776			2.81752	0.0918918
0.04	4.15903	0.21371			2.75132	0.102122
0.05	4.14341	0.20756			2.70575	0.112692
0.06	4.09216	0.214477			2.6833	0.121576
0.07	4.09602	0.223849			2.74751	0.110646
0.08	3.98548	0.216138			2.69902	0.133416
0.09	3.9983	0.231701			2.68084	0.130362
0.1	3.95125	0.231278			2.64909	0.122314
0.11	3.89298	0.247315			2.65241	0.150209
0.12	3.79136	0.254021			2.60438	0.126666
0.13	3.7504	0.246874			2.60957	0.142784
0.14	3.64629	0.244336			2.63201	0.16378
0.15	3.6674	0.285639			2.73743	0.182119
0.16	3.5803	0.284769			2.54203	0.151969
0.17	3.46383	0.258112			2.44261	0.161164
0.18	3.43056	0.257111			2.54579	0.192793
0.19	3.41204	0.301737			2.46463	0.160541
0.2	3.28705	0.267214			2.43803	0.156309
0.21	3.19198	0.250235			2.43594	0.156594
0.22	3.14254	0.265306			2.45373	0.168554
0.23	3.09911	0.278155			2.31988	0.145011
0.24	3.07256	0.27696			2.27193	0.133546
0.25	2.97345	0.273923			2.15091	0.116127
0.26	2.86695	0.248359			2.1821	0.143772
0.27	2.73729	0.215732			2.18321	0.158623
0.28	2.70005	0.248247			2.19084	0.163892
0.29	2.69985	0.278878			2.21348	0.168485
0.3	2.63768	0.262288			2.13502	0.166718
0.31	2.66297	0.271738			2.09324	0.127437
0.32	2.54323	0.254763			2.05696	0.141125
0.33	2.52524	0.261561			1.97477	0.139068
0.34	2.3816	0.216558			1.93904	0.158675
0.35	2.38457	0.220278			2.001	0.133411
0.36	2.33628	0.277021			1.97151	0.11703
0.37	2.22437	0.257179			1.84996	0.121893
0.38	2.24226	0.254504			1.81896	0.124685
0.39	2.18141	0.237673			1.78035	0.129728
0.4	2.1105	0.222774			1.79025	0.125033
0.41	2.08675	0.241985			1.73511	0.115679
0.42	2.08374	0.280933			1.70378	0.110774
0.43	1.98576	0.21954			1.69123	0.128103
0.44	1.92328	0.203355			1.69028	0.127526
0.45	1.90882	0.226682			1.60293	0.113012
0.46	1.92248	0.22538			1.61412	0.0988283
0.47	1.87902	0.215958			1.59417	0.101854
0.48	1.87789	0.241919			1.51089	0.0879274
0.49	1.83428	0.240365			1.5004	0.102407
0.5	1.89207	0.287036			1.47042	0.101955
0.51	1.72139	0.216294			1.43108	0.107516
0.52	1.6938	0.19556			1.39989	0.0978639
0.53	1.6027	0.147727			1.42371	0.108676
0.54	1.56555	0.133167			1.36356	0.0867404
0.55	1.61716	0.211314			1.25478	0.0820564
0.56	1.56945	0.183573			1.27924	0.0815081
0.57	1.55086	0.173411			1.32269	0.084418
0.58	1.52685	0.184498			1.25415	0.0858971
0.59	1.48558	0.167922			1.2742	0.0995917
0.6	1.46572	0.178352			1.25953	0.0883249
0.61	1.40623	0.170876			1.21155	0.0719254
0.62	1.37865	0.16569			1.17772	0.0828043
0.63	1.38501	0.161417			1.19001	0.0819793
0.64	1.32382	0.14316			1.16574	0.0853763
0.65	1.25703	0.122384			1.12312	0.0734779
0.66	1.29016	0.130251			1.14294	0.0817898
0.67	1.25261	0.116493			1.09444	0.0656891
0.68	1.26862	0.138332			1.09007	0.0744068
0.69	1.21963	0.141913			1.06614	0.0674664
0.7	1.19383	0.123721			1.03993	0.0634991
0.71	1.14305	0.114216			1.04971	0.0633801
0.72	1.13715	0.113046			1.0391	0.070057
0.73	1.12092	0.0991117			1.04329	0.0670904
0.74	1.06604	0.09104			1.02389	0.0644072
0.75	1.04508	0.0824007			0.99105	0.0537119
0.76	1.03223	0.0817242			0.994562	0.0537823
0.77	1.00352	0.0714278			0.990426	0.051722
0.78	1.00412	0.0811905			0.97084	0.0425051
0.79	1.00447	0.0912384			0.97461	0.0493172
0.8	0.968323	0.0774942			0.978373	0.0529294
0.81	0.930818	0.0628354			0.968996	0.0443769
0.82	0.915448	0.0515216			0.947865	0.0447652
0.83	0.921327	0.0585129			0.947605	0.0448983
0.84	0.898961	0.054197			0.94945	0.0483701
0.85	0.896816	0.0516764			0.950272	0.0483909
0.86	0.877524	0.049904			0.921175	0.0418498
0.87	0.892292	0.0525336			0.918195	0.0458813
0.88	0.88585	0.0452254			0.903417	0.0432043
0.89	0.871735	0.0410683			0.925689	0.0440414
0.9	0.870667	0.0398467			0.924289	0.0452406
0.91	0.85708	0.040749			0.912186	0.0416136
0.92	0.860382	0.0421826			0.909086	0.0415315
0.93	0.869931	0.0382181			0.917611	0.0424293
0.94	0.872959	0.0390777			0.91771	0.0415524
0.95	0.880783	0.0352481			0.950852	0.0415608
0.96	0.893671	0.0402041			0.952884	0.0408189
0.97	0.911224	0.0363387			0.987401	0.0427554
0.98	0.964957	0.043081			1.03309	0.0482557
0.99	1.03666	0.0442279			1.08664	0.0535519
1	1.20097	0.0536894			1.22917	0.0648239
