# Supplementary material for: Gdf3 is required for robust Nodal signaling during germ layer formation and left-right patterning
Source: eLife. 2017 Nov 15;6:e28635. doi: 10.7554/eLife.28635 (PMC5745080; doi:10.7554/eLife.28635)
Supplement: Figure 4—source data 1. [file elife-28635-fig4-data1.xlsx]

## Sheet: Sheet1
Figure 4A
spaw in situ
Injection amounts
gdf3 MO	5ng
p53 MO	5ng
	Absent	Left LPM	Bilateral	Right LPM	Total
Uninjected	0	52	0	0	52
gdf3 MO + p53 MO injected	45	3	0	2	50
	Absent	Left LPM	Bilateral	Right LPM	Total
Uninjected	0	100	0	0	100
gdf3 MO + p53 MO injected	90	6	0	4	100
