# Supplementary material for: Gdf3 is required for robust Nodal signaling during germ layer formation and left-right patterning
Source: eLife. 2017 Nov 15;6:e28635. doi: 10.7554/eLife.28635 (PMC5745080; doi:10.7554/eLife.28635)
Supplement: Figure 4—source data 2. [file elife-28635-fig4-data2.xlsx]

## Sheet: Sheet1
Figure 4C
dand5 in situ
Injection amounts:
gdf3 MO	5 ng
p53 MO	5 ng
	Raw values
	Absent	Left Bias	Symmetric	Right Bias	Total
Uninjected		1	1	23	25
gdf3 MO + p53 MO injected		2	20	2	24
	Percentage
	Absent	Left Bias	Symmetric	Right Bias	Total
Uninjected	0	4	4	92	100
gdf3 MO + p53 MO injected	0	8.33333	83.3333	8.33333	100
