# Supplementary material for: Gdf3 is required for robust Nodal signaling during germ layer formation and left-right patterning
Source: eLife. 2017 Nov 15;6:e28635. doi: 10.7554/eLife.28635 (PMC5745080; doi:10.7554/eLife.28635)
Supplement: Figure 4—source data 3. [file elife-28635-fig4-data3.xlsx]

## Sheet: Sheet2
Figure 4D
spaw in situ
Injection amounts
gdf3 MO	4 ng
ntla MO	2 ng
Raw values	spaw expression
	Absent	Left LPM	Bilateral	Right LPM	Total
Uninjected	0	16	0	0	16
gdf3 MO injection	19	0	0	0	19
ntla MO injection	0	0	22	0	22
ntla MO+ gdf3 MO injection	14	0	2	0	16
Percentage
	Absent	Left LPM	Bialteral	Right LPM	Total
Uninjected	0	100	0	0	100
gdf3 MO injection	100	0	0	0	100
ntla MO injection	0	0	100	0	100
ntla MO+ gdf3 MO injection	87.5	0	12.5	0	100
