# Supplementary material for: Gdf3 is required for robust Nodal signaling during germ layer formation and left-right patterning
Source: eLife. 2017 Nov 15;6:e28635. doi: 10.7554/eLife.28635 (PMC5745080; doi:10.7554/eLife.28635)
Supplement: Figure 5—source data 1. [file elife-28635-fig5-data1.xlsx]

## Sheet: sheet1 (3)
Figure 5A
Heart jogging
	Somite stage		1 dpf	1 dpf
MZgdf3	jogging		Raw Counts	Percentage
gdf3-/- X gdf3-/-; 10 pg gdf3 mRNA	Left jog		8	25
	Center jog		14	43.75
	Right jog		0	0
	Other		10	31.25
		Total	32	100
	Somite stage		1 dpf	1 dpf
MZgdf3	jogging		Raw Counts	Percentage
gdf3-/- X gdf3-/-; 25 pg gdf3 mRNA	Left jog		23	52.2727
	Center jog		11	25
	Right jog		10	22.7273
	Other		0	0
		Total	44	100
	Age		1 dpf	1 dpf
Mgdf3	jogging		Raw Counts	Percentage
gdf3-/- X WT; 50 pg gdf3 mRNA	Left jog		20	86.9565
	Center jog		0	0
	Right jog		3	13.0435
	Other defect		0	0
		Total	23	100
	Somite stage		1 dpf	1 dpf
MZgdf3	jogging		Raw Counts	Percentage
gdf3-/- X gdf3-/-; 50 pg gdf3 mRNA	Left jog		17	51.5152
	Center jog		1	3.0303
	Right jog		15	45.4545
	Other		0	0
		Total	33	100
	Somite stage		1 dpf	1 dpf
MZgdf3	jogging		Raw Counts	Percentage
gdf3-/- X gdf3-/-; 100 pg gdf3 mRNA	Left jog		30	65.2174
	Center jog		1	2.17391
	Right jog		15	32.6087
	Other		0	0
		Total	46	100
