# Supplementary material for: Gdf3 is required for robust Nodal signaling during germ layer formation and left-right patterning
Source: eLife. 2017 Nov 15;6:e28635. doi: 10.7554/eLife.28635 (PMC5745080; doi:10.7554/eLife.28635)
Supplement: Figure 5—source data 2. [file elife-28635-fig5-data2.xlsx]

## Sheet: sheet1 (3)
Figure 5B
spaw in situ
	Somite stage		12ss	12ss
MZgdf3	spaw espression		Raw Counts	Percentage
gdf3-/- X gdf3-/-	Left LPM		0	0
	Right LPM		0	0
	Left bias bilateral		0	0
	Right bias bilateral		0	0
	Absent		20	100
		Total	20	100
	Somite stage		12 ss	12 ss
Mgdf3	spaw espression		Raw Counts	Percentage
gdf3-/- X WT	Left LPM		0	0
	Right LPM		0	0
	Left bias bilateral		0	0
	Right bias bilateral		0	0
	Absent		18	100
		Total	18	100
	Somite stage		12 ss	12 ss
MZgdf3	spaw espression		Raw Counts	Percentage
gdf3-/- X gdf3-/-; 50 pg gdf3 mRNA	Left LPM		16	43.2432
	Right LPM		7	18.9189
	Left bias bilateral		5	13.5135
	Right bias bilateral		1	2.7027
	Absent		8	21.6216
		Total	37	100
	Somite stage		12 ss	12 ss
Mgdf3	spaw espression		Raw Counts	Percentage
gdf3-/- X WT; 50 pg gdf3 mRNA	Left LPM		13	72.2222
	Right LPM		1	5.55556
	Left bias bilateral		0	0
	Right bias bilateral		1	5.55556
	Absent		3	16.6667
		Total	18	100
