# Supplementary material for: Gdf3 is required for robust Nodal signaling during germ layer formation and left-right patterning
Source: eLife. 2017 Nov 15;6:e28635. doi: 10.7554/eLife.28635 (PMC5745080; doi:10.7554/eLife.28635)
Supplement: Figure 5—source data 3. [file elife-28635-fig5-data3.xlsx]

## Sheet: sheet1 (3)
	Figure 5C
	dand5 in situ
		Somite stage		10 ss	10 ss
		dand5 expression		Raw Counts	Percentage
gdf3-/- X gdf3-/-; + 50pg gdf3	MZgdf3; 50 pg gdf3 mRNA	Left		0	0
		Right		7	41.1765
		Symmetric		10	58.8235
		None		0	0
			Total	17	100
		Somite stage		10 ss	10 ss
		dand5 expression		Raw Counts	Percentage
gdf3-/- X WT; + 50 pg gdf3	Mgdf3; 50 pg gdf3 mRNA	Left		0	0
		Right		17	94.4444
		Symmetric		1	5.55556
		None		0	0
			Total	18	100
